# Supplementary material
Source: PubMed Central journal article supplement (PMC6149523)
Supplement: NIHMS979338-supplement-2.pdf [file NIHMS979338-supplement-2.pdf]

Supplementary Information

## **The molecular genetic basis of herbivory between butterflies and their host-plants**

Sumitha Nallu, Jason A. Hill, Kristine Don, Carlos Sahagun, Wei Zhang, Camille Meslin, Emilie Snell-Rood, Nathan L. Clark, Nathan I. Morehouse, Joy Bergelson, Christopher W. Wheat and Marcus R. Kronforst

**Supplementary Table 1.** List of 96 *A. thaliana* accessions used in *Arabidopsis* GWAS.

| <b>Accession name</b> | <b>country</b> | <b>Stockparent</b> | <b>collector</b> | <b>Collection date</b> | <b>country</b> | <b>Latitude</b> | <b>Longitude</b> | <b>Site</b> |
|-----------------------|----------------|--------------------|------------------|------------------------|----------------|-----------------|------------------|-------------|
| Ag-0                  | France         | CS22630            | Albert Kranz     | NA                     | France         | 45              | 1.3              | Ag          |
| An-1                  | Belgium        | CS22626            | Albert Kranz     | NA                     | Belgium        | 51.2167         | 4.4              | An          |
| Bay-0                 | Germany        | CS22633            | Albert Kranz     | NA                     | Germany        | 49              | 11               | Bay         |
| Bil-5                 | Sweden         | CS22578            | Magnus Nordborg  | 6/25/2000              | Sweden         | 63.324          | 18.484           | Bil         |
| Bil-7                 | Sweden         | CS22579            | Magnus Nordborg  | 6/25/2000              | Sweden         | 63.324          | 18.484           | Bil         |
| Bor-1                 | Czech          | CS22590            | Jirina Relichová | 5/31/2000              | Czech Republic | 49.4013         | 16.2326          | Bor         |
| Bor-4                 | Czech          | CS22591            | Jirina Relichová | 5/31/2000              | Czech Republic | 49.4013         | 16.2326          | Bor         |
| Br-0                  | Czech          | CS22628            | Albert Kranz     | NA                     | Czech Republic | 49.2            | 16.6166          | Br          |
| Bur-0                 | Ireland        | CS22656            | Albert Kranz     | NA                     | Ireland        | 54.1            | -6.2             | Bur         |
| C24                   | Portugal       | CS22620            | Brigitte Damm    | NA                     | Portugal       | 40.2077         | -8.42639         | Co          |
| CIBC-17               | UK             | CS22603            | Mick Crawley     | 5/21/1993              | United Kingdom | 51.4083         | -0.6383          | CIBC        |
| CIBC-5                | UK             | CS22602            | Mick Crawley     | 5/21/1993              | United Kingdom | 51.4083         | -0.6383          | CIBC        |
| Col-0                 | USA            | CS22625            | Albert Kranz     | NA                     | USA            | 38.3            | -92.3            | Col         |
| Ct-1                  | Italy          | CS22639            | Albert Kranz     | NA                     | Italy          | 37.3            | 15               | Ct          |
| Cvi-0                 | Cape Verde     | CS22614            | Albert Kranz     | NA                     | Cape Verde     | 15.1111         | -23.6167         | Cvi         |

|        |          |         |                      |           |                |           |           |      |
|--------|----------|---------|----------------------|-----------|----------------|-----------|-----------|------|
| Eden-1 | Sweden   | CS22572 | Magnus Nordborg      | 6/25/2000 | Sweden         | 62.877    | 18.177    | Eden |
| Eden-2 | Sweden   | CS22573 | Magnus Nordborg      | 6/25/2000 | Sweden         | 62.877    | 18.177    | Eden |
| Edi-0  | UK       | CS22657 | Albert Kranz         | NA        | United Kingdom | 55.949444 | -3.160278 | Edi  |
| Ei-2   | Germany  | CS22616 | Albert Kranz         | NA        | Germany        | 50.3      | 6.3       | Ei   |
| Est-1  | Russia   | CS22629 | Albert Kranz         | NA        | Russia         | 58.3      | 25.3      | Est  |
| Fäb-2  | Sweden   | CS22576 | Magnus Nordborg      | 6/25/2000 | Sweden         | 63.0165   | 18.3174   | Fäb  |
| Fäb-4  | Sweden   | CS22577 | Magnus Nordborg      | 6/25/2000 | Sweden         | 63.0165   | 18.3174   | Fäb  |
| Fei-0  | Portugal | CS22645 | Carlos Alonso-Blanco | NA        | Portugal       | 40.5      | -8.32     | Fei  |
| Ga-0   | Germany  | CS22634 | Albert Kranz         | NA        | Germany        | 50.3      | 8         | Ga   |
| Got-22 | Germany  | CS22609 | Gerhard Röbbelen     | NA        | Germany        | 51.5338   | 9.9355    | GOT  |
| Got-7  | Germany  | CS22608 | Gerhard Röbbelen     | NA        | Germany        | 51.5338   | 9.9355    | GOT  |
| Gu-0   | Germany  | CS22617 | Albert Kranz         | NA        | Germany        | 50.3      | 8         | Gu   |
| Gy-0   | France   | CS22631 | Albert Kranz         | NA        | France         | 49        | 2         | Gy   |
| HR-10  | UK       | CS22597 | Mick Crawley         | 5/21/1993 | United Kingdom | 51.4083   | -0.6383   | HR   |
| HR-5   | UK       | CS22596 | Mick Crawley         | 5/21/1993 | United Kingdom | 51.4083   | -0.6383   | HR   |
| Kas-2  | India    | CS6751  | Shauna Somerville    | 1/1/1976  | India          | 35        | 77        | Kas  |

|         |            |         |                  |           |                |         |         |         |
|---------|------------|---------|------------------|-----------|----------------|---------|---------|---------|
| Kin-0   | USA        | CS22654 | Albert Kranz     | NA        | USA            | 44.46   | -85.37  | Kin     |
| Kno-10  | USA        | CS22566 | Joy Bergelson    | 34111     | USA            | 41.2816 | -86.621 | Knox    |
| Kno-18  | USA        | CS22567 | Joy Bergelson    | 34111     | USA            | 41.2816 | -86.621 | Knox    |
| Kondara | Tajikistan | CS22651 | Igor Vizir       | NA        | Tajikistan     | 38.48   | 68.49   | Kondara |
| Kz-1    | Kazakhstan | CS22606 | Ihsan Al-Shehbaz | 6/7/1994  | Kazakhstan     | 49.5    | 73.1    | KZ      |
| Kz-9    | Kazakhstan | CS22607 | Ihsan Al-Shehbaz | 6/7/1994  | Kazakhstan     | 49.5    | 73.1    | KZ      |
| Ler-1   | Germany    | CS22618 | Eric Holub       | NA        | Germany        | 47.984  | 10.8719 | Ler     |
| LL-0    | Spain      | CS22650 | Albert Kranz     | NA        | Spain          | 41.59   | 2.49    | Ll      |
| Löv-1   | Sweden     | CS22574 | Magnus Nordborg  | 6/25/2000 | Sweden         | 62.801  | 18.079  | Löv     |
| Löv-5   | Sweden     | CS22575 | Magnus Nordborg  | 6/25/2000 | Sweden         | 62.801  | 18.079  | Löv     |
| Lp2-2   | Czech      | CS22594 | Ivo Cetyl        | NA        | Czech Republic | 49.38   | 16.81   | Lp2     |
| Lp2-6   | Czech      | CS22595 | Ivo Cetyl        | NA        | Czech Republic | 49.38   | 16.81   | Lp2     |
| Lz-0    | France     | CS22615 | Albert Kranz     | NA        | France         | 46      | 3.3     | Lz      |
| Mr-0    | Italy      | CS22640 | Albert Kranz     | NA        | Italy          | 44.15   | 9.65    | Mr      |
| Mrk-0   | Germany    | CS22635 | Albert Kranz     | NA        | Germany        | 49      | 9.3     | Mrk     |
| Ms-0    | Russia     | CS22655 | Albert Kranz     | NA        | Russia         | 55.7522 | 37.6322 | Ms      |
| Mt-0    | Libya      | CS22642 | Albert Kranz     | NA        | Libya          | 32.34   | 22.46   | Mt      |

|        |             |         |                  |           |                |           |           |            |
|--------|-------------|---------|------------------|-----------|----------------|-----------|-----------|------------|
| Mz-0   | Germany     | CS22636 | Albert Kranz     | NA        | Germany        | 50.3      | 8.3       | Mz         |
| N13    | Russia      | CS22491 | Andy Savushkin   | NA        | Russia         | 61.36     | 34.15     | Konchezero |
| Nd-1   | Switzerland | CS22619 | Eric Holub       | NA        | Switzerland    | 50        | 10        | Nd         |
| NFA-10 | UK          | CS22599 | Mick Crawley     | 5/21/1993 | United Kingdom | 51.4083   | -0.6383   | NFA        |
| NFA-8  | UK          | CS22598 | Mick Crawley     | 5/21/1993 | United Kingdom | 51.4083   | -0.6383   | NFA        |
| Nok-3  | Netherlands | CS22643 | Albert Kranz     | NA        | Netherlands    | 52.24     | 4.45      | Nok        |
| ÖMö2-1 | Sweden      | CS22584 | Magnus Nordborg  | 5/14/2000 | Sweden         | 56.1481   | 15.821214 | ÖMö2       |
| ÖMö2-3 | Sweden      | CS22585 | Magnus Nordborg  | 5/14/2000 | Sweden         | 56.147363 | 15.814587 | ÖMö2       |
| Oy-0   | Norwegia    | CS22658 | Albert Kranz     | NA        | Norway         | 60.385543 | 6.193019  | Oy         |
| Pna-10 | USA         | CS22571 | Joy Bergelson    | NA        | USA            | 42.0945   | -86.3253  | PNA        |
| Pna-17 | USA         | CS22570 | Joy Bergelson    | NA        | USA            | 42.0945   | -86.3253  | PNA        |
| Pro-0  | Spain       | CS22649 | Joy Bergelson    | NA        | Spain          | 43.25     | -6        | Pro        |
| Pu2-23 | Czech       | CS22593 | Ivo Cetyl        | NA        | Czech Republic | 49.42     | 16.36     | Pu2        |
| Pu2-7  | Czech       | CS22592 | Ivo Cetyl        | NA        | Czech Republic | 49.42     | 16.36     | Pu2        |
| Ra-0   | France      | CS22632 | Albert Kranz     | NA        | France         | 46        | 3.3       | Ra         |
| Ren-1  | France      | CS22610 | Gerhard Röbbelen | NA        | France         | 48.5      | -1.41     | REN        |
| Ren-11 | France      | CS22611 | Gerhard Röbbelen | NA        | France         | 48.5      | -1.41     | REN        |

|          |            |         |                 |           |                |         |          |       |
|----------|------------|---------|-----------------|-----------|----------------|---------|----------|-------|
| Rmx-A02  | USA        | CS22568 | Joy Bergelson   | NA        | USA            | 42.036  | -86.511  | RMX   |
| Rmx-A180 | USA        | CS22569 | Joy Bergelson   | NA        | USA            | 42.036  | -86.511  | RMX   |
| RRS-10   | USA        | CS22565 | Joy Bergelson   | NA        | USA            | 41.5609 | -86.4251 | RRS   |
| RRS-7    | USA        | CS22564 | Joy Bergelson   | NA        | USA            | 41.5609 | -86.4251 | RRS   |
| Se-0     | Spain      | CS22646 | Albert Kranz    | NA        | Spain          | 38.3333 | -3.53333 | Se    |
| Shahdara | Tajikistan | CS22652 | Igor Vizir      | NA        | Tajikistan     | 38.35   | 68.48    | Sha   |
| Sorbo    | Tajikistan | CS22653 | Igor Vizir      | NA        | Tajikistan     | 38.35   | 68.48    | Sorbo |
| Spr1-2   | Sweden     | CS22582 | Magnus Nordborg | 5/15/2000 | Sweden         | 58.4168 | 14.1612  | Spr1  |
| Spr1-6   | Sweden     | CS22583 | Magnus Nordborg | 5/15/2000 | Sweden         | 58.4168 | 14.1612  | Spr1  |
| Sq-1     | UK         | CS22600 | Mick Crawley    | 5/21/1993 | United Kingdom | 51.4083 | -0.6383  | SQ    |
| Sq-8     | UK         | CS22601 | Mick Crawley    | 5/21/1993 | United Kingdom | 51.4083 | -0.6383  | SQ    |
| Tamm-2   | Finland    | CS22604 | Outi Savolainen | NA        | Finland        | 60      | 23.5     | Tamm  |
| Tamm-27  | Finland    | CS22605 | Outi Savolainen | NA        | Finland        | 60      | 23.5     | Tamm  |
| Ts-1     | Spain      | CS22647 | Albert Kranz    | NA        | Spain          | 41.7194 | 2.93056  | Ts    |
| Ts-5     | Spain      | CS22648 | Albert Kranz    | NA        | Spain          | 41.7194 | 2.93056  | Ts    |
| Tsu-1    | Japan      | CS22641 | Eric Holub      | NA        | Japan          | 34.43   | 136.31   | Tsu   |
| Ull2-3   | Sweden     | CS22587 | Magnus Nordborg | 5/14/2000 | Sweden         | 56.0648 | 13.9707  | Ull2  |

|        |             |         |                  |           |                |         |          |      |
|--------|-------------|---------|------------------|-----------|----------------|---------|----------|------|
| UII2-5 | Sweden      | CS22586 | Magnus Nordborg  | 5/14/2000 | Sweden         | 56.0648 | 13.9707  | UII2 |
| Uod-1  | Austria     | CS22612 | Marcus Koch      | 6/23/2000 | Austria        | 48.3    | 14.45    | Uod  |
| Uod-7  | Austria     | CS22613 | Marcus Koch      | 6/23/2000 | Austria        | 48.3    | 14.45    | Uod  |
| Van-0  | Canada      | CS22627 | Albert Kranz     | NA        | Canada         | 49.2655 | -123.206 | Van  |
| Vår2-1 | Sweden      | CS22580 | Magnus Nordborg  | 6/1/2000  | Sweden         | 55.58   | 14.334   | V?r2 |
| Vår2-6 | Sweden      | CS22581 | Magnus Nordborg  | 6/1/2000  | Sweden         | 55.58   | 14.334   | V?r2 |
| Wa-1   | Poland      | CS22644 | Albert Kranz     | NA        | Poland         | 52.3    | 21       | Wa   |
| Wei-0  | Switzerland | CS22622 | Alan Slusarenko  | NA        | Switzerland    | 47.25   | 8.26     | Wei  |
| Ws-0   | Russia      | CS22623 | Albert Kranz     | NA        | Russia         | 52.3    | 30       | Ws   |
| Ws-2   | Russia      | CS22659 | Kenneth Feldmann | NA        | Russia         | 52.3    | 30       | Ws   |
| Wt-5   | Germany     | CS22637 | Albert Kranz     | NA        | Germany        | 52.3    | 9.3      | Wt   |
| Yo-0   | USA         | CS22624 | Albert Kranz     | NA        | USA            | 37.45   | -119.35  | Yo   |
| Zdr-1  | Czech       | CS22588 | Jirina Relichová | 5/31/2000 | Czech Republic | 49.3853 | 16.2544  | Zdr  |
| Zdr-6  | Czech       | CS22589 | Jirina Relichová | 5/31/2000 | Czech Republic | 49.3853 | 16.2544  | Zdr  |

**Supplementary Table 2.** List of 96 *P. rapae* individuals used in *Pieris* GWAS

| <b>Sample ID</b> | <b>Location</b>           | <b># Reads</b> | <b>Sequencing Depth (X)</b> | <b>SNPs per sample</b> | <b>Breadth of genome coverage</b> |
|------------------|---------------------------|----------------|-----------------------------|------------------------|-----------------------------------|
| SN1-1            | University of Chicago, IL | 16,835,642     | 10.42                       | 3,831,390              | 0.91                              |
| SN1-2            | University of Chicago, IL | 16,690,476     | 10.33                       | 3,499,432              | 0.89                              |
| SN1-3            | University of Chicago, IL | 26,957,598     | 16.68                       | 4,262,071              | 0.94                              |
| SN1-4            | University of Chicago, IL | 18,250,528     | 11.29                       | 3,792,942              | 0.91                              |
| SN1-5            | Schaumburg, IL            | 28,371,122     | 17.56                       | 3,778,816              | 0.92                              |
| SN1-6            | University of Chicago, IL | 25,206,968     | 15.60                       | 4,120,740              | 0.93                              |
| SN1-7            | University of Chicago, IL | 23,495,440     | 14.54                       | 4,199,475              | 0.93                              |
| SN1-8            | University of Chicago, IL | 28,485,402     | 17.63                       | 4,328,932              | 0.94                              |
| SN1-9            | University of Chicago, IL | 15,116,196     | 9.35                        | 3,686,801              | 0.90                              |
| SN1-10           | University of Chicago, IL | 19,030,478     | 11.78                       | 4,565,351              | 0.93                              |
| SN1-11           | University of Chicago, IL | 27,052,932     | 16.74                       | 5,358,852              | 0.95                              |
| SN1-12           | University of Chicago, IL | 14,893,910     | 9.22                        | 2,928,379              | 0.80                              |
| SN1-13           | University of Chicago, IL | 18,059,212     | 11.18                       | 3,828,798              | 0.91                              |
| SN1-14           | University of Chicago, IL | 22,820,320     | 14.12                       | 3,983,847              | 0.92                              |
| SN1-15           | University of Chicago, IL | 36,021,418     | 22.29                       | 4,356,063              | 0.94                              |
| SN1-16           | University of Chicago, IL | 12,271,404     | 7.59                        | 3,419,565              | 0.87                              |
| SN1-17           | University of Chicago, IL | 26,675,546     | 16.51                       | 4,189,629              | 0.94                              |
| SN1-18           | University of Chicago, IL | 22,361,262     | 13.84                       | 3,926,289              | 0.92                              |
| SN1-19           | University of Chicago, IL | 18,815,332     | 11.64                       | 3,919,399              | 0.91                              |
| SN1-20           | University of Chicago, IL | 21,906,464     | 13.56                       | 4,663,772              | 0.94                              |
| SN1-21           | University of Chicago, IL | 18,279,550     | 11.31                       | 3,771,071              | 0.90                              |
| SN1-22           | University of Chicago, IL | 11,794,858     | 7.30                        | 4,002,105              | 0.88                              |
| SN1-23           | University of Chicago, IL | 18,078,476     | 11.19                       | 3,817,351              | 0.91                              |
| SN1-24           | University of Chicago, IL | 26,813,358     | 16.59                       | 4,215,037              | 0.94                              |
| SN2-1            | University of Chicago, IL | 35,502,330     | 21.97                       | 4,404,469              | 0.95                              |
| SN2-2            | University of Chicago, IL | 26,399,338     | 16.34                       | 4,418,141              | 0.94                              |
| SN2-3            | University of Chicago, IL | 12,114,480     | 7.50                        | 3,369,810              | 0.87                              |
| SN2-4            | University of Chicago, IL | 30,325,014     | 18.77                       | 4,340,905              | 0.94                              |
| SN2-5            | University of Chicago, IL | 28,937,674     | 17.91                       | 4,257,918              | 0.94                              |
| SN2-6            | University of Chicago, IL | 24,441,562     | 15.13                       | 4,098,097              | 0.93                              |
| SN2-7            | University of Chicago, IL | 14,409,634     | 8.92                        | 3,298,740              | 0.87                              |
| SN2-8            | University of Chicago, IL | 17,851,616     | 11.05                       | 3,686,303              | 0.90                              |
| SN2-9            | University of Chicago, IL | 29,575,908     | 18.30                       | 4,242,049              | 0.94                              |
| SN2-10           | University of Chicago, IL | 25,206,240     | 15.60                       | 4,170,416              | 0.93                              |
| SN2-11           | University of Chicago, IL | 12,842,508     | 7.95                        | 3,354,444              | 0.87                              |
| SN2-12           | University of Chicago, IL | 28,153,206     | 17.42                       | 4,421,812              | 0.94                              |
| SN2-13           | University of Chicago, IL | 16,721,526     | 10.35                       | 3,738,070              | 0.90                              |



|        |                                   |            |       |           |      |
|--------|-----------------------------------|------------|-------|-----------|------|
| SN2-14 | University of Chicago, IL         | 25,174,770 | 15.58 | 4,145,893 | 0.93 |
| SN2-15 | University of Chicago, IL         | 23,191,436 | 14.35 | 3,917,609 | 0.92 |
| SN2-16 | University of Chicago, IL         | 30,018,634 | 18.58 | 4,213,145 | 0.94 |
| SN2-17 | University of Chicago, IL         | 23,429,212 | 14.50 | 4,058,390 | 0.93 |
| SN2-18 | University of Chicago, IL         | 31,742,776 | 19.64 | 4,156,959 | 0.93 |
| SN2-19 | University of Chicago, IL         | 24,448,420 | 15.13 | 4,052,921 | 0.93 |
| SN2-20 | University of Chicago, IL         | 18,959,980 | 11.73 | 3,722,312 | 0.90 |
| SN2-21 | University of Chicago, IL         | 39,691,768 | 24.56 | 4,830,783 | 0.95 |
| SN2-22 | University of Chicago, IL         | 24,922,346 | 15.42 | 4,264,440 | 0.94 |
| SN2-23 | University of Chicago, IL         | 39,987,340 | 24.75 | 4,401,123 | 0.95 |
| SN2-24 | University of Chicago, IL         | 34,115,436 | 21.11 | 4,447,627 | 0.94 |
| SN2-25 | University of Chicago, IL         | 16,194,606 | 10.02 | 3,468,528 | 0.88 |
| SN2-26 | University of Chicago, IL         | 17,365,278 | 10.75 | 3,814,271 | 0.91 |
| SN2-27 | University of Chicago, IL         | 15,122,652 | 9.36  | 4,306,601 | 0.90 |
| SN2-28 | Schaumburg, IL                    | 31,841,314 | 19.71 | 4,374,753 | 0.94 |
| SN2-29 | Schaumburg, IL                    | 17,495,634 | 10.83 | 3,694,208 | 0.90 |
| SN2-30 | Schaumburg, IL                    | 14,902,966 | 9.22  | 3,780,863 | 0.89 |
| SN2-31 | Schaumburg, IL                    | 15,245,638 | 9.43  | 3,839,257 | 0.91 |
| SN2-32 | University of Chicago, IL         | 45,800,742 | 28.34 | 4,341,145 | 0.94 |
| SN2-33 | Schaumburg, IL                    | 24,533,058 | 15.18 | 4,160,031 | 0.93 |
| SN2-34 | Schaumburg, IL                    | 29,684,602 | 18.37 | 4,194,515 | 0.93 |
| SN2-35 | Schaumburg, IL                    | 27,851,996 | 17.24 | 4,270,839 | 0.94 |
| SN2-36 | Schaumburg, IL                    | 22,625,152 | 14.00 | 4,080,784 | 0.93 |
| SN2-37 | Schaumburg, IL                    | 14,306,364 | 8.85  | 3,057,695 | 0.88 |
| SN2-38 | Schaumburg, IL                    | 18,849,984 | 11.67 | 3,790,211 | 0.90 |
| SN2-39 | Schaumburg, IL                    | 23,002,558 | 14.24 | 3,844,742 | 0.91 |
| SN2-40 | Schaumburg, IL                    | 15,183,264 | 9.40  | 3,780,936 | 0.90 |
| SN3-1  | Schaumburg, IL                    | 15,620,068 | 9.67  | 3,785,333 | 0.90 |
| SN3-2  | Schaumburg, IL                    | 29,512,116 | 18.26 | 4,169,538 | 0.93 |
| SN3-3  | Schaumburg, IL                    | 21,037,624 | 13.02 | 3,917,810 | 0.91 |
| SN3-4  | University of Chicago, IL         | 24,676,850 | 15.27 | 4,088,482 | 0.93 |
| SN3-5  | Schaumburg, IL                    | 14,681,648 | 9.09  | 3,434,508 | 0.87 |
| SN3-6  | Chicago downtown, IL              | 21,271,010 | 13.16 | 4,081,587 | 0.92 |
| SN3-7  | Schaumburg, IL                    | 14,866,824 | 9.20  | 3,781,025 | 0.89 |
| SN3-8  | University of Chicago, IL         | 17,898,040 | 11.08 | 3,798,314 | 0.91 |
| SN3-9  | Schaumburg, IL                    | 17,474,592 | 10.81 | 3,845,304 | 0.91 |
| SN3-10 | University of Chicago, IL         | 21,455,300 | 13.28 | 4,018,951 | 0.92 |
| SN3-11 | Carolina Biological Supply,<br>NC | 18,661,246 | 11.55 | 3,221,765 | 0.90 |
| SN3-12 | Chicago downtown, IL              | 25,666,124 | 15.88 | 4,148,584 | 0.93 |
| SN3-13 | University of Chicago, IL         | 19,371,456 | 11.99 | 3,879,331 | 0.91 |

|        |                           |            |       |           |      |
|--------|---------------------------|------------|-------|-----------|------|
| SN3-14 | University of Chicago, IL | 38,173,414 | 23.62 | 4,341,148 | 0.94 |
| SN3-15 | Chicago downtown, IL      | 17,197,960 | 10.64 | 3,831,755 | 0.91 |
| SN3-16 | University of Chicago, IL | 19,148,234 | 11.85 | 3,923,953 | 0.92 |
| SN3-17 | Langdon, ND               | 10,667,446 | 6.60  | 3,327,261 | 0.86 |
| SN3-18 | Langdon, ND               | 15,693,070 | 9.71  | 3,689,625 | 0.89 |
| SN3-19 | Langdon, ND               | 20,140,606 | 12.46 | 3,912,035 | 0.91 |
| SN3-20 | Langdon, ND               | 34,623,120 | 21.43 | 4,438,222 | 0.94 |
| SN3-21 | Langdon, ND               | 23,224,660 | 14.37 | 4,108,532 | 0.93 |
| SN3-22 | Langdon, ND               | 20,277,212 | 12.55 | 3,997,092 | 0.92 |
| SN3-23 | Langdon, ND               | 21,832,814 | 13.51 | 3,815,381 | 0.90 |
| SN3-24 | Langdon, ND               | 17,669,434 | 10.93 | 3,513,475 | 0.88 |
| SN3-25 | Langdon, ND               | 10,645,710 | 6.59  | 3,397,642 | 0.84 |
| SN3-26 | Langdon, ND               | 16,729,946 | 10.35 | 3,739,124 | 0.90 |
| SN3-27 | Langdon, ND               | 15,135,064 | 9.37  | 3,651,243 | 0.89 |
| SN3-28 | Langdon, ND               | 28,124,188 | 17.40 | 4,454,347 | 0.94 |
| SN3-29 | Langdon, ND               | 34,790,408 | 21.53 | 4,421,381 | 0.95 |
| SN3-30 | Langdon, ND               | 18,450,192 | 11.42 | 3,960,058 | 0.92 |
| SN3-31 | Langdon, ND               | 11,127,958 | 6.89  | 3,287,501 | 0.85 |
| SN3-32 | Langdon, ND               | 15,590,884 | 9.65  | 3,720,455 | 0.90 |

**Supplementary Table 3.** Individual values, means, and statistical tests for *Arabidopsis* SALK T-DNA mutants shown in Fig. 1c. For each mutant, we used Student's t-test to compare to control (Col-0). Shaded *p*-values indicate statistical significance after Bonferroni correction.

Larval weight gain (mg)

| SALK mutant | Rep1 | Rep2 | Rep3 | Rep4 | Rep5 | Rep6 | Mean | s.e.m. | <i>p</i> -value |
|-------------|------|------|------|------|------|------|------|--------|-----------------|
| AT4G20320   | 6.1  | 5.4  | 6.2  | 7.4  | 6.4  | 7.5  | 6.50 | 0.33   | 3.23E-05        |
| IMPA-1      | 6.4  | 6.3  | 6.1  | 6.4  | 6.3  | 6.2  | 6.30 | 0.05   | 1.29E-13        |
| CYP79B2     | 6.7  | 6.6  | 6.4  | 5.8  | 5    | 6.7  | 6.20 | 0.28   | 1.62E-05        |
| CYP705A33   | 6.2  | 4.5  | 6.9  | 5.7  | 6.8  | 5.9  | 6.00 | 0.36   | 9.36E-05        |
| PROPEP1     | 4.5  | 4.4  | 4.6  | 4.5  | 4.5  | 4.2  | 4.45 | 0.06   | 5.12E-11        |
| PROPEP3     | 5.5  | 2.6  | 5.3  | 3.7  | 2.6  | 4.6  | 4.05 | 0.53   | 0.014571        |
| PAI3        | 3.5  | 3.3  | 3.5  | 3.4  | 3.5  | 3.5  | 3.45 | 0.03   | 2.49E-08        |
| AT1G29470   | 3.4  | 3    | 3.2  | 3.3  | 3.1  | 3.3  | 3.22 | 0.06   | 1.24E-07        |
| RABE1b      | 2.2  | 2.5  | 2.4  | 2.3  | 2.3  | 2.1  | 2.30 | 0.06   | 0.064648        |
| TRX z       | 1.8  | 1.9  | 1.8  | 1.7  | 1.7  | 1.8  | 1.78 | 0.03   | 0.000635        |
| AT1G47530   | 0.9  | 1.1  | 1    | 1.2  | 1.3  | 1.1  | 1.10 | 0.06   | 1.52E-07        |
| AT3G26510   | 0.9  | 1.1  | 1.1  | 1    | 1.1  | 1.1  | 1.05 | 0.03   | 1.21E-07        |
| Col-0       | 2.2  | 2.1  | 2.3  | 1.9  | 2.1  | 2.2  | 2.13 | 0.06   |                 |

Leaf material eaten (cm<sup>2</sup>)

| SALK mutant | Rep1  | Rep2  | Rep3  | Mean  | s.e.m. | <i>p</i> -value |
|-------------|-------|-------|-------|-------|--------|-----------------|
| AT4G20320   | 3.094 | 3.275 | 3.194 | 3.188 | 0.052  | 4.06E-05        |
| IMPA-1      | 3.053 | 3.163 | 3.216 | 3.144 | 0.048  | 3.39E-05        |
| CYP79B2     | 4.888 | 4.926 | 4.987 | 4.934 | 0.029  | 3.5E-06         |
| CYP705A33   | 2.968 | 2.867 | 2.855 | 2.897 | 0.036  | 6.66E-05        |
| PROPEP1     | 3.247 | 3.102 | 3.212 | 3.187 | 0.044  | 2.5E-05         |
| PROPEP3     | 2.760 | 2.566 | 2.606 | 2.644 | 0.059  | 0.000459        |
| PAI3        | 2.743 | 2.578 | 2.681 | 2.667 | 0.048  | 0.00019         |
| AT1G29470   | 3.083 | 2.871 | 2.995 | 2.983 | 0.062  | 0.000165        |
| RABE1b      | 1.457 | 1.425 | 1.531 | 1.471 | 0.031  | 0.00681         |
| TRX z       | 1.720 | 1.761 | 1.685 | 1.722 | 0.022  | 0.299914        |
| AT1G47530   | 0.998 | 1.093 | 1.182 | 1.091 | 0.053  | 0.000649        |
| AT3G26510   | 1.467 | 1.514 | 1.403 | 1.461 | 0.032  | 0.006075        |
| Col-0       | 1.807 | 1.698 | 1.852 | 1.786 | 0.046  |                 |

**Supplementary Table 4.** List of various time points for RNA-seq sample collection

| <b>Time points</b>                         | <b>Host Plants (Treatment)</b>                                                                                      | <b>Host Plants (Control)</b>                                                        | <b>Butterflies (Treatment)</b>                                                                                        | <b>Butterflies (Control)</b>                                                                   |
|--------------------------------------------|---------------------------------------------------------------------------------------------------------------------|-------------------------------------------------------------------------------------|-----------------------------------------------------------------------------------------------------------------------|------------------------------------------------------------------------------------------------|
| 72 h after oviposition                     | leaves with eggs                                                                                                    | control leaves without eggs<br><i>(entire plant not exposed)</i>                    | eggs deposited on leaves                                                                                              | eggs deposited on wax paper                                                                    |
| 24 h of larval feeding, age of larvae ~48h | leaves after 24 h of larval feeding from plants previously exposed to eggs                                          | control leaves never exposed to eggs or larvae<br><i>(entire plant not exposed)</i> | larvae after 24 h of feeding on leaves from plants exposed to eggs<br><i>(larvae from eggs laid on plants)</i>        | larvae after 24 h of feeding on artificial diet<br><i>(larvae from eggs laid on wax paper)</i> |
|                                            | leaves after 24 h of larval feeding from plants not previously exposed to eggs<br><i>(entire plant not exposed)</i> |                                                                                     | larvae after 24 h of feeding on leaves from plants not exposed to eggs<br><i>(larvae from eggs laid on wax paper)</i> |                                                                                                |
| 24 h after mechanical wounding             | leaves 24 h after mechanical wounding                                                                               |                                                                                     | n/a                                                                                                                   | n/a                                                                                            |

**Supplementary Table 5.** RNA-seq based expression values (fragments per kilobase of transcript per million fragments mapped, or FPKM), means, s.e.m, and results of Tukey (HSD) test for all pairwise comparisons of treatments for each herbivory candidate gene identified in *Arabidopsis thaliana* and *Pieris rapae* GWAS in Figure 3.

**Figure 3a**

| <b>AT4G20320</b>        |             |             |             |             |                   |                           |   |   |  |
|-------------------------|-------------|-------------|-------------|-------------|-------------------|---------------------------|---|---|--|
| <i>Treatment</i>        | <i>rep1</i> | <i>rep2</i> | <i>rep3</i> | <i>mean</i> | <i>std. error</i> | <i>Tukey (HSD) Groups</i> |   |   |  |
| leaves with eggs        | 4.38        | 4.121       | 3.787       | 4.096       | 0.171640127       |                           |   | C |  |
| leaf ctrl for eggs      | 9.021       | 3.753       | 4.637       | 5.803666667 | 1.628781685       |                           | B | C |  |
| leaves with larvae      | 15.049      | 13.683      | 13.528      | 14.08666667 | 0.483242635       | A                         | B |   |  |
| leaves with larvae+eggs | 19.901      | 13.872      | 13.228      | 15.667      | 2.125147132       | A                         |   |   |  |
| leaf ctrl for larvae    | 7.753       | 13.858      | 12.806      | 11.47233333 | 1.884299723       | A                         | B | C |  |
| wounded leaves          | 19.506      | 11.214      | 10.476      | 13.732      | 2.89484991        | A                         | B |   |  |
| <b>CYP705A33</b>        |             |             |             |             |                   |                           |   |   |  |
| <i>Treatment</i>        | <i>rep1</i> | <i>rep2</i> | <i>rep3</i> | <i>mean</i> | <i>std. error</i> | <i>Tukey (HSD) Groups</i> |   |   |  |
| leaves with eggs        | 1.916       | 2.796       | 3.066       | 2.593       | 0.34719511        |                           | B | C |  |
| leaf ctrl for eggs      | 1.169       | 0.368       | 1.353       | 0.963       | 0.302368612       |                           |   | C |  |
| leaves with larvae      | 2.081       | 4.147       | 4.421       | 3.55        | 0.738580922       | A                         | B |   |  |
| leaves with larvae+eggs | 4.496       | 5.298       | 6.351       | 5.382       | 0.537123925       | A                         |   |   |  |
| leaf ctrl for larvae    | 1.391       | 0.173       | 0.277       | 0.614       | 0.389824462       |                           |   | C |  |
| wounded leaves          | 1.379       | 1.278       | 1.108       | 1.255       | 0.079071697       |                           |   | C |  |
| <b>PROPEP3</b>          |             |             |             |             |                   |                           |   |   |  |
| <i>Treatment</i>        | <i>rep1</i> | <i>rep2</i> | <i>rep3</i> | <i>mean</i> | <i>std. error</i> | <i>Tukey (HSD) Groups</i> |   |   |  |
| leaves with eggs        | 2.719       | 2.164       | 2.008       | 2.297       | 0.215752173       | A                         |   |   |  |
| leaf ctrl for eggs      | 0.654       | 0.382       | 0.322       | 0.453       | 0.102145865       | A                         |   |   |  |
| leaves with larvae      | 1.866       | 2.248       | 2.727       | 2.28        | 0.249074509       | A                         |   |   |  |
| leaves with larvae+eggs | 7.362       | 1.964       | 1.497       | 3.608       | 1.882001269       | A                         |   |   |  |
| leaf ctrl for larvae    | 0.133       | 0.735       | 1.279       | 0.716       | 0.330962905       | A                         |   |   |  |
| wounded leaves          | 0.965       | 1.505       | 2.158       | 1.543       | 0.344904012       | A                         |   |   |  |

| <b>PROPEP1</b>          |             |             |             |             |                   |                           |   |   |   |   |
|-------------------------|-------------|-------------|-------------|-------------|-------------------|---------------------------|---|---|---|---|
| <i>Treatment</i>        | <i>rep1</i> | <i>rep2</i> | <i>rep3</i> | <i>mean</i> | <i>std. error</i> | <i>Tukey (HSD) Groups</i> |   |   |   |   |
| leaves with eggs        | 3.515       | 4.058       | 3.76        | 3.778       | 0.156999292       | A                         |   |   |   |   |
| leaf ctrl for eggs      | 0.919       | 0.171       | 0.455       | 0.515       | 0.218003058       |                           |   |   |   | D |
| leaves with larvae      | 2.618       | 2.823       | 4.436       | 3.292       | 0.574887332       | A                         | B |   |   |   |
| leaves with larvae+eggs | 2.028       | 1.415       | 1.052       | 1.498       | 0.284811244       |                           |   |   | C | D |
| leaf ctrl for larvae    | 1.11        | 1.157       | 1.002       | 1.09        | 0.045885122       |                           |   |   | C | D |
| wounded leaves          | 2.227       | 1.566       | 2.805       | 2.199       | 0.357935904       |                           | B | C |   |   |
| <b>CYP79B2</b>          |             |             |             |             |                   |                           |   |   |   |   |
| <i>Treatment</i>        | <i>rep1</i> | <i>rep2</i> | <i>rep3</i> | <i>mean</i> | <i>std. error</i> | <i>Tukey (HSD) Groups</i> |   |   |   |   |
| leaves with eggs        | 3.302       | 3.649       | 3.874       | 3.608       | 0.166369402       |                           |   |   | C |   |
| leaf ctrl for eggs      | 38.547      | 18.726      | 25.587      | 27.62       | 5.811420566       |                           | B | C |   |   |
| leaves with larvae      | 54.229      | 99.085      | 99.018      | 84.111      | 14.94084585       | A                         | B |   |   |   |
| leaves with larvae+eggs | 80.51       | 108.677     | 105.335     | 98.174      | 8.884535497       | A                         |   |   |   |   |
| leaf ctrl for larvae    | 80.505      | 14.106      | 13.531      | 36.047      | 22.22945306       |                           | B | C |   |   |
| wounded leaves          | 6.294       | 20.875      | 10.732      | 12.634      | 4.315230482       |                           |   |   | C |   |
| <b>AT1G29470</b>        |             |             |             |             |                   |                           |   |   |   |   |
| <i>Treatment</i>        | <i>rep1</i> | <i>rep2</i> | <i>rep3</i> | <i>mean</i> | <i>std. error</i> | <i>Tukey (HSD) Groups</i> |   |   |   |   |
| leaves with eggs        | 10.463      | 9.699       | 10.113      | 10.092      | 0.220805596       |                           | B |   |   |   |
| leaf ctrl for eggs      | 23.679      | 18.094      | 15.835      | 19.203      | 2.331232888       | A                         |   |   |   |   |
| leaves with larvae      | 11.963      | 13.362      | 13.405      | 12.91       | 0.473662679       | A                         | B |   |   |   |
| leaves with larvae+eggs | 16.042      | 16.06       | 16.128      | 16.077      | 0.026187359       | A                         | B |   |   |   |
| leaf ctrl for larvae    | 16.099      | 15.344      | 14.251      | 15.231      | 0.536437736       | A                         | B |   |   |   |
| wounded leaves          | 8.137       | 18.723      | 11.362      | 12.741      | 3.132698003       | A                         | B |   |   |   |
| <b>IMPA-1</b>           |             |             |             |             |                   |                           |   |   |   |   |
| <i>Treatment</i>        | <i>rep1</i> | <i>rep2</i> | <i>rep3</i> | <i>mean</i> | <i>std. error</i> | <i>Tukey (HSD) Groups</i> |   |   |   |   |
| leaves with eggs        | 11.184      | 10.281      | 10.174      | 10.54633333 | 0.320326049       |                           |   |   | C |   |
| leaf ctrl for eggs      | 19.851      | 13.212      | 14.2        | 15.75433333 | 2.06809448        |                           | B | C |   |   |
| leaves with larvae      | 18.323      | 18.202      | 17.402      | 17.97566667 | 0.288952322       | A                         | B |   |   |   |

|                         |             |             |             |             |                   |                           |   |   |  |
|-------------------------|-------------|-------------|-------------|-------------|-------------------|---------------------------|---|---|--|
| leaves with larvae+eggs | 20.964      | 15.743      | 15.55       | 17.419      | 1.773375407       | A                         | B | C |  |
| leaf ctrl for larvae    | 17.637      | 12.809      | 13.094      | 14.51333333 | 1.563998757       |                           | B | C |  |
| wounded leaves          | 20.844      | 26.733      | 22.479      | 23.352      | 1.75515213        | A                         |   |   |  |
| <b>PAI3</b>             |             |             |             |             |                   |                           |   |   |  |
| <i>Treatment</i>        | <i>rep1</i> | <i>rep2</i> | <i>rep3</i> | <i>mean</i> | <i>std. error</i> | <i>Tukey (HSD) Groups</i> |   |   |  |
| leaves with eggs        | 1.922       | 2.421       | 3.214       | 2.519       | 0.376173276       | A                         |   |   |  |
| leaf ctrl for eggs      | 0.766       | 0.619       | 1.165       | 0.85        | 0.163116523       |                           | B |   |  |
| leaves with larvae      | 1.769       | 1.86        | 2.595       | 2.075       | 0.261489537       | A                         |   |   |  |
| leaves with larvae+eggs | 1.638       | 1.313       | 2.099       | 1.683       | 0.22802802        | A                         | B |   |  |
| leaf ctrl for larvae    | 0.769       | 0.886       | 1.002       | 0.886       | 0.067261513       |                           | B |   |  |
| wounded leaves          | 1.261       | 1.893       | 1.19        | 1.448       | 0.223442013       | A                         | B |   |  |
| <b>TRX z</b>            |             |             |             |             |                   |                           |   |   |  |
| <i>Treatment</i>        | <i>rep1</i> | <i>rep2</i> | <i>rep3</i> | <i>mean</i> | <i>std. error</i> | <i>Tukey (HSD) Groups</i> |   |   |  |
| leaves with eggs        | 75          | 75.95       | 73          | 74.65       | 0.869386757       | A                         |   |   |  |
| leaf ctrl for eggs      | 72          | 73          | 91          | 78.667      | 7.348469228       | A                         |   |   |  |
| leaves with larvae      | 52          | 96          | 79          | 75.667      | 12.8105859        | A                         |   |   |  |
| leaves with larvae+eggs | 117         | 132         | 87          | 112         | 13.22875656       | A                         |   |   |  |
| leaf ctrl for larvae    | 141         | 107         | 88          | 112         | 15.50268794       | A                         |   |   |  |
| wounded leaves          | 124         | 89          | 77          | 96.667      | 14.09885732       | A                         |   |   |  |
| <b>RABE1b</b>           |             |             |             |             |                   |                           |   |   |  |
| <i>Treatment</i>        | <i>rep1</i> | <i>rep2</i> | <i>rep3</i> | <i>mean</i> | <i>std. error</i> | <i>Tukey (HSD) Groups</i> |   |   |  |
| leaves with eggs        | 1195        | 1098        | 812         | 1035        | 114.9623127       |                           | B |   |  |
| leaf ctrl for eggs      | 2162        | 1831.98     | 1924        | 1972.66     | 98.32623726       |                           | B |   |  |
| leaves with larvae      | 1318        | 2201        | 1495        | 1671.333333 | 269.7173418       |                           | B |   |  |
| leaves with larvae+eggs | 1925        | 2958        | 1848        | 2243.666667 | 357.8576688       |                           | B |   |  |
| leaf ctrl for larvae    | 4664        | 3175        | 3872.99     | 3903.996667 | 430.116771        | A                         |   |   |  |
| wounded leaves          | 2287        | 2109        | 1768        | 2054.666667 | 152.2654845       |                           | B |   |  |
| <b>AT1G47530</b>        |             |             |             |             |                   |                           |   |   |  |
| <i>Treatment</i>        | <i>rep1</i> | <i>rep2</i> | <i>rep3</i> | <i>mean</i> | <i>std. error</i> | <i>Tukey (HSD) Groups</i> |   |   |  |

|                         |             |             |             |             |                   |                           |   |  |  |
|-------------------------|-------------|-------------|-------------|-------------|-------------------|---------------------------|---|--|--|
| leaves with eggs        | 335         | 307         | 190         | 277.333     | 44.40845765       | A                         |   |  |  |
| leaf ctrl for eggs      | 275         | 183         | 259         | 239         | 28.37839554       | A                         |   |  |  |
| leaves with larvae      | 401         | 522         | 379         | 434         | 44.45597073       | A                         |   |  |  |
| leaves with larvae+eggs | 392         | 796         | 447         | 545         | 126.5003294       | A                         |   |  |  |
| leaf ctrl for larvae    | 239         | 391         | 509         | 379.667     | 78.14800772       | A                         |   |  |  |
| wounded leaves          | 441         | 200         | 254         | 298.333     | 73.01674085       | A                         |   |  |  |
| <b>AT3G26510</b>        |             |             |             |             |                   |                           |   |  |  |
| <i>Treatment</i>        | <i>rep1</i> | <i>rep2</i> | <i>rep3</i> | <i>mean</i> | <i>std. error</i> | <i>Tukey (HSD) Groups</i> |   |  |  |
| leaves with eggs        | 173         | 191         | 192         | 185.333     | 6.173419726       |                           | B |  |  |
| leaf ctrl for eggs      | 85          | 159         | 303         | 182.333     | 64.00347213       |                           | B |  |  |
| leaves with larvae      | 150.78      | 281         | 209         | 213.593     | 37.66136895       |                           | B |  |  |
| leaves with larvae+eggs | 461         | 817.99      | 495         | 591.33      | 113.7542185       | A                         |   |  |  |
| leaf ctrl for larvae    | 195         | 312         | 332         | 279.667     | 42.72522024       |                           | B |  |  |
| wounded leaves          | 457         | 225         | 300         | 327.333     | 68.35284274       | A                         | B |  |  |

**Figure 3b**

| <b>Ppro</b>                |             |             |             |             |                   |                           |   |  |  |
|----------------------------|-------------|-------------|-------------|-------------|-------------------|---------------------------|---|--|--|
| <i>Treatment</i>           | <i>rep1</i> | <i>rep2</i> | <i>rep3</i> | <i>mean</i> | <i>std. error</i> | <i>Tukey (HSD) Groups</i> |   |  |  |
| eggs on wax paper          | 5.294       | 6.646       | 6.856       | 6.265       | 6.265             | A                         |   |  |  |
| eggs on plants             | 2.514       | 2.29        | 2.943       | 2.582       | 2.582             |                           | B |  |  |
| larvae on artificial diet  | 3.728       | 3.772       | 3.479       | 3.660       | 3.660             |                           | B |  |  |
| larvae on plants           | 6.871       | 6.41        | 4.978       | 6.086       | 6.086             | A                         |   |  |  |
| larvae on plants with eggs | 4.728       | 3.467       | 2.871       | 3.689       | 3.689             |                           | B |  |  |
| pupa                       | 4           | NA          | NA          | NA          | NA                | NA                        |   |  |  |
| adult male                 | 4           | NA          | NA          | NA          | NA                | NA                        |   |  |  |
| adult female               | 5           | NA          | NA          | NA          | NA                | NA                        |   |  |  |
| <b>NPHS1</b>               |             |             |             |             |                   |                           |   |  |  |



| <i>Treatment</i>           | <i>rep1</i> | <i>rep2</i> | <i>rep3</i> | <i>mean</i> | <i>std. error</i> | <i>Tukey (HSD) Groups</i> |   |   |
|----------------------------|-------------|-------------|-------------|-------------|-------------------|---------------------------|---|---|
| eggs on wax paper          | 0.739       | 0.502       | 0.724       | 0.655       | 0.655             |                           | B |   |
| eggs on plants             | 1.13        | 0.469       | 1.158       | 0.919       | 0.919             |                           | B |   |
| larvae on artificial diet  | 3.14        | 3.262       | 4.343       | 3.582       | 3.582             | A                         |   |   |
| larvae on plants           | 3.89        | 5.87        | 3.72        | 4.493       | 4.493             | A                         |   |   |
| larvae on plants with eggs | 4.551       | 5.177       | 5.288       | 5.005       | 5.005             | A                         |   |   |
| pupa                       | 3859.86     | NA          | NA          | NA          | NA                | NA                        |   |   |
| adult male                 | 1           | NA          | NA          | NA          | NA                | NA                        |   |   |
| adult female               | 1           | NA          | NA          | NA          | NA                | NA                        |   |   |
| <b>slc5a9</b>              |             |             |             |             |                   |                           |   |   |
| <i>Treatment</i>           | <i>rep1</i> | <i>rep2</i> | <i>rep3</i> | <i>mean</i> | <i>std. error</i> | <i>Tukey (HSD) Groups</i> |   |   |
| eggs on wax paper          | 15.548      | 10.071      | 12.316      | 12.645      | 12.645            | A                         |   |   |
| eggs on plants             | 9.136       | 6.162       | 9.854       | 8.384       | 8.384             |                           | B |   |
| larvae on artificial diet  | 2.452       | 2.067       | 2.966       | 2.495       | 2.495             |                           |   | C |
| larvae on plants           | 3.347       | 3.453       | 3.064       | 3.288       | 3.288             |                           |   | C |
| larvae on plants with eggs | 2.387       | 2.968       | 2.568       | 2.641       | 2.641             |                           |   | C |
| pupa                       | 7           | NA          | NA          | NA          | NA                | NA                        |   |   |
| adult male                 | 3           | NA          | NA          | NA          | NA                | NA                        |   |   |
| adult female               | 4           | NA          | NA          | NA          | NA                | NA                        |   |   |
| <b>NATT4_2</b>             |             |             |             |             |                   |                           |   |   |
| <i>Treatment</i>           | <i>rep1</i> | <i>rep2</i> | <i>rep3</i> | <i>mean</i> | <i>std. error</i> | <i>Tukey (HSD) Groups</i> |   |   |
| eggs on wax paper          | 7.889       | 8.213       | 8.454       | 8.185       | 8.185             | A                         |   |   |
| eggs on plants             | 8.432       | 4.849       | 8.281       | 7.187       | 7.187             | A                         | B |   |
| larvae on artificial diet  | 8.131       | 8.665       | 7.469       | 8.088       | 8.088             | A                         |   |   |

|                            |             |             |             |             |                   |                           |   |  |
|----------------------------|-------------|-------------|-------------|-------------|-------------------|---------------------------|---|--|
| larvae on plants           | 8.478       | 5.544       | 8.6         | 7.541       | 7.541             | A                         | B |  |
| larvae on plants with eggs | 5.034       | 4.35        | 4.556       | 4.647       | 4.647             |                           | B |  |
| pupa                       | 10          | NA          | NA          | NA          | NA                | NA                        |   |  |
| adult male                 | 8           | NA          | NA          | NA          | NA                | NA                        |   |  |
| adult female               | 6           | NA          | NA          | NA          | NA                | NA                        |   |  |
| <b>rnf168</b>              |             |             |             |             |                   |                           |   |  |
| <i>Treatment</i>           | <i>rep1</i> | <i>rep2</i> | <i>rep3</i> | <i>mean</i> | <i>std. error</i> | <i>Tukey (HSD) Groups</i> |   |  |
| eggs on wax paper          | 1.608       | 2.085       | 2.017       | 1.903       | 1.903             | A                         |   |  |
| eggs on plants             | 0.868       | 0.054       | 0.571       | 0.498       | 0.498             |                           | B |  |
| larvae on artificial diet  | 0.213       | 0.523       | 0.907       | 0.548       | 0.548             |                           | B |  |
| larvae on plants           | 0.776       | 0.81        | 0.996       | 0.861       | 0.861             |                           | B |  |
| larvae on plants with eggs | 0.847       | 0.77        | 0.814       | 0.810       | 0.810             |                           | B |  |
| pupa                       | 56          | NA          | NA          | NA          | NA                | NA                        |   |  |
| adult male                 | 62          | NA          | NA          | NA          | NA                | NA                        |   |  |
| adult female               | 48          | NA          | NA          | NA          | NA                | NA                        |   |  |
| <b>pela_2</b>              |             |             |             |             |                   |                           |   |  |
| <i>Treatment</i>           | <i>rep1</i> | <i>rep2</i> | <i>rep3</i> | <i>mean</i> | <i>std. error</i> | <i>Tukey (HSD) Groups</i> |   |  |
| eggs on wax paper          | 28          | 35          | 40          | 34.333      | 3.480             |                           | B |  |
| eggs on plants             | 44          | 58          | 34          | 45.333      | 6.960             |                           | B |  |
| larvae on artificial diet  | 85          | 89          | 110         | 94.667      | 7.753             | A                         |   |  |
| larvae on plants           | 115         | 98          | 95          | 102.667     | 6.227             | A                         |   |  |
| larvae on plants with eggs | 110         | 104         | 87          | 100.333     | 6.888             | A                         |   |  |
| pupa                       | 56          | NA          | NA          | NA          | NA                | NA                        |   |  |
| adult male                 | 62          | NA          | NA          | NA          | NA                | NA                        |   |  |
| adult female               | 48          | NA          | NA          | NA          | NA                | NA                        |   |  |
| <b>resilin_7</b>           |             |             |             |             |                   |                           |   |  |

| <i>Treatment</i>           | <i>rep1</i> | <i>rep2</i> | <i>rep3</i> | <i>mean</i> | <i>std. error</i> | <i>Tukey (HSD) Groups</i> |   |   |
|----------------------------|-------------|-------------|-------------|-------------|-------------------|---------------------------|---|---|
| eggs on wax paper          | 23          | 28          | 20          | 23.667      | 2.333             |                           |   | C |
| eggs on plants             | 33          | 30          | 21          | 28.000      | 3.606             |                           | B | C |
| larvae on artificial diet  | 68          | 64          | 61          | 64.333      | 2.028             |                           | B |   |
| larvae on plants           | 90          | 126         | 130         | 115.333     | 12.719            | A                         |   |   |
| larvae on plants with eggs | 152         | 138         | 111         | 133.667     | 12.032            | A                         |   |   |
| pupa                       | 64          | NA          | NA          | NA          | NA                | NA                        |   |   |
| adult male                 | 68          | NA          | NA          | NA          | NA                | NA                        |   |   |
| adult female               | 53          | NA          | NA          | NA          | NA                | NA                        |   |   |
| <b>POLX</b>                |             |             |             |             |                   |                           |   |   |
| <i>Treatment</i>           | <i>rep1</i> | <i>rep2</i> | <i>rep3</i> | <i>mean</i> | <i>std. error</i> | <i>Tukey (HSD) Groups</i> |   |   |
| eggs on wax paper          | 1034        | 781         | 928         | 914.333     | 73.354            | A                         |   |   |
| eggs on plants             | 1162        | 898         | 897         | 985.667     | 88.167            | A                         |   |   |
| larvae on artificial diet  | 891         | 1036        | 924         | 950.333     | 43.880            | A                         |   |   |
| larvae on plants           | 844         | 1082        | 997         | 974.333     | 69.633            | A                         |   |   |
| larvae on plants with eggs | 812         | 1014        | 819         | 881.667     | 66.197            | A                         |   |   |
| pupa                       | 951         | NA          | NA          | NA          | NA                | NA                        |   |   |
| adult male                 | 910         | NA          | NA          | NA          | NA                | NA                        |   |   |
| adult female               | 889         | NA          | NA          | NA          | NA                | NA                        |   |   |
| <b>Obfc1</b>               |             |             |             |             |                   |                           |   |   |
| <i>Treatment</i>           | <i>rep1</i> | <i>rep2</i> | <i>rep3</i> | <i>mean</i> | <i>std. error</i> | <i>Tukey (HSD) Groups</i> |   |   |
| eggs on wax paper          | 166         | 150         | 154         | 156.667     | 4.807             |                           |   | C |
| eggs on plants             | 164         | 99          | 110         | 124.333     | 20.086            |                           |   | C |
| larvae on artificial diet  | 309         | 320         | 268         | 299.000     | 15.822            | A                         |   |   |
| larvae on plants           | 229         | 231         | 240         | 233.333     | 3.383             |                           | B |   |

|                            |             |             |             |             |                   |                           |   |   |
|----------------------------|-------------|-------------|-------------|-------------|-------------------|---------------------------|---|---|
| larvae on plants with eggs | 259         | 270         | 242         | 257.000     | 8.145             | A                         | B |   |
| pupa                       | 98          | NA          | NA          | NA          | NA                | NA                        |   |   |
| adult male                 | 110         | NA          | NA          | NA          | NA                | NA                        |   |   |
| adult female               | 121         | NA          | NA          | NA          | NA                | NA                        |   |   |
| <b>DHX35</b>               |             |             |             |             |                   |                           |   |   |
| <i>Treatment</i>           | <i>rep1</i> | <i>rep2</i> | <i>rep3</i> | <i>mean</i> | <i>std. error</i> | <i>Tukey (HSD) Groups</i> |   |   |
| eggs on wax paper          | 620         | 526         | 628         | 591.333     | 32.748            |                           | B |   |
| eggs on plants             | 623         | 674         | 576         | 624.333     | 28.298            | A                         | B |   |
| larvae on artificial diet  | 770         | 716         | 725         | 737.000     | 16.703            | A                         |   |   |
| larvae on plants           | 796         | 697         | 727         | 740.000     | 29.309            | A                         |   |   |
| larvae on plants with eggs | 727         | 717         | 766         | 736.667     | 14.948            | A                         |   |   |
| pupa                       | 653         | NA          | NA          | NA          | NA                | NA                        |   |   |
| adult male                 | 540         | NA          | NA          | NA          | NA                | NA                        |   |   |
| adult female               | 631         | NA          | NA          | NA          | NA                | NA                        |   |   |
| <b>Glo1</b>                |             |             |             |             |                   |                           |   |   |
| <i>Treatment</i>           | <i>rep1</i> | <i>rep2</i> | <i>rep3</i> | <i>mean</i> | <i>std. error</i> | <i>Tukey (HSD) Groups</i> |   |   |
| eggs on wax paper          | 1123        | 1038        | 1016        | 1059.000    | 32.624            |                           |   | C |
| eggs on plants             | 1179        | 1157        | 1138        | 1158.000    | 11.846            |                           | B | C |
| larvae on artificial diet  | 1397        | 1486        | 1389        | 1424.000    | 31.086            | A                         | B |   |
| larvae on plants           | 1761        | 1539        | 1324        | 1541.333    | 126.156           | A                         |   |   |
| larvae on plants with eggs | 1433        | 1684        | 1347        | 1488.000    | 101.096           | A                         | B |   |
| pupa                       | 1152        | NA          | NA          | NA          | NA                | NA                        |   |   |
| adult male                 | 1259        | NA          | NA          | NA          | NA                | NA                        |   |   |
| adult female               | 1180        | NA          | NA          | NA          | NA                | NA                        |   |   |
| <b>thap11</b>              |             |             |             |             |                   |                           |   |   |
| <i>Treatment</i>           | <i>rep1</i> | <i>rep2</i> | <i>rep3</i> | <i>mean</i> | <i>std. error</i> | <i>Tukey (HSD) Groups</i> |   |   |

|                            |             |             |             |             |                   |                           |   |  |
|----------------------------|-------------|-------------|-------------|-------------|-------------------|---------------------------|---|--|
| eggs on wax paper          | 2630        | 2009        | 2180        | 2273.000    | 185.200           |                           | B |  |
| eggs on plants             | 2636        | 2592        | 2195        | 2474.333    | 140.243           |                           | B |  |
| larvae on artificial diet  | 5245        | 5003        | 4100        | 4782.667    | 348.409           | A                         |   |  |
| larvae on plants           | 4698        | 4142        | 3220        | 4020.000    | 431.000           | A                         | B |  |
| larvae on plants with eggs | 4625        | 6528        | 4147        | 5100.000    | 727.211           | A                         |   |  |
| pupa                       | 2331        | NA          | NA          | NA          | NA                | NA                        |   |  |
| adult male                 | 3041        | NA          | NA          | NA          | NA                | NA                        |   |  |
| adult female               | 2865        | NA          | NA          | NA          | NA                | NA                        |   |  |
| <b>MYLK2DHX35</b>          |             |             |             |             |                   |                           |   |  |
| <i>Treatment</i>           | <i>rep1</i> | <i>rep2</i> | <i>rep3</i> | <i>mean</i> | <i>std. error</i> | <i>Tukey (HSD) Groups</i> |   |  |
| eggs on wax paper          | 9.354       | 13.496      | 12.346      | 11.732      | 1.234             | A                         |   |  |
| eggs on plants             | 6.981       | 7.501       | 6.661       | 7.048       | 0.245             |                           | B |  |
| larvae on artificial diet  | 8.581       | 9.051       | 7.736       | 8.456       | 0.385             |                           | B |  |
| larvae on plants           | 6.151       | 7.692       | 6.16        | 6.668       | 0.512             |                           | B |  |
| larvae on plants with eggs | 6.257       | 7.228       | 7.02        | 6.835       | 0.295             |                           | B |  |
| pupa                       | 493.49      | NA          | NA          | NA          | NA                | NA                        |   |  |
| adult male                 | 0           | NA          | NA          | NA          | NA                | NA                        |   |  |
| adult female               | 0           | NA          | NA          | NA          | NA                | NA                        |   |  |
| <b>Hmcn2HMCN1</b>          |             |             |             |             |                   |                           |   |  |
| <i>Treatment</i>           | <i>rep1</i> | <i>rep2</i> | <i>rep3</i> | <i>mean</i> | <i>std. error</i> | <i>Tukey (HSD) Groups</i> |   |  |
| eggs on wax paper          | 0.751       | 0.596       | 0.523       | 0.623       | 0.067             |                           | B |  |
| eggs on plants             | 1.227       | 0.643       | 0.978       | 0.949       | 0.169             |                           | B |  |
| larvae on artificial diet  | 2.889       | 2.801       | 3.425       | 3.038       | 0.195             | A                         |   |  |
| larvae on plants           | 3.236       | 5.308       | 3.184       | 3.909       | 0.699             | A                         |   |  |

|                            |        |      |       |       |       |    |  |  |
|----------------------------|--------|------|-------|-------|-------|----|--|--|
| larvae on plants with eggs | 4.022  | 4.09 | 4.463 | 4.192 | 0.137 | A  |  |  |
| pupa                       | 323.06 | NA   | NA    | NA    | NA    | NA |  |  |
| adult male                 | 0      | NA   | NA    | NA    | NA    | NA |  |  |
| adult female               | 0      | NA   | NA    | NA    | NA    | NA |  |  |

**Figure 3c**

| <b>Xpac</b>                |             |             |             |             |                   |                           |  |  |
|----------------------------|-------------|-------------|-------------|-------------|-------------------|---------------------------|--|--|
| <i>Treatment</i>           | <i>rep1</i> | <i>rep2</i> | <i>rep3</i> | <i>mean</i> | <i>std. error</i> | <i>Tukey (HSD) Groups</i> |  |  |
| eggs on wax paper          | 12.215      | 15.33       | 15.348      | 14.298      | 1.041             | A                         |  |  |
| eggs on plants             | 13.355      | 28.919      | 14.285      | 18.853      | 0.661             | A                         |  |  |
| larvae on artificial diet  | 14.985      | 14.318      | 11.022      | 13.442      | 4.890             | A                         |  |  |
| larvae on plants           | 8.057       | 7.569       | 10.11       | 8.579       | 5.040             | A                         |  |  |
| larvae on plants with eggs | 7.668       | 8.349       | 8.217       | 8.078       | 4.766             | A                         |  |  |
| pupa                       | 1093.12     | NA          | NA          | NA          | NA                | NA                        |  |  |
| adult male                 | 0           | NA          | NA          | NA          | NA                | NA                        |  |  |
| adult female               | 0           | NA          | NA          | NA          | NA                | NA                        |  |  |
| <b>Beg</b>                 |             |             |             |             |                   |                           |  |  |
| <i>Treatment</i>           | <i>rep1</i> | <i>rep2</i> | <i>rep3</i> | <i>mean</i> | <i>std. error</i> | <i>Tukey (HSD) Groups</i> |  |  |
| eggs on wax paper          | 15.859      | 17.579      | 19.217      | 17.552      | 0.969             | A                         |  |  |
| eggs on plants             | 19.057      | 37.17       | 20.116      | 25.448      | 0.521             | A                         |  |  |
| larvae on artificial diet  | 21.465      | 22.995      | 21.394      | 21.951      | 6.011             | A                         |  |  |

|                            |             |             |             |             |                   |                           |  |  |  |
|----------------------------|-------------|-------------|-------------|-------------|-------------------|---------------------------|--|--|--|
| larvae on plants           | 15.505      | 20.535      | 20.898      | 18.979      | 5.869             | A                         |  |  |  |
| larvae on plants with eggs | 17.477      | 17.435      | 18.479      | 17.797      | 5.474             | A                         |  |  |  |
| pupa                       | 37.96       | NA          | NA          | NA          | NA                | NA                        |  |  |  |
| adult male                 | 0           | NA          | NA          | NA          | NA                | NA                        |  |  |  |
| adult female               | 0           | NA          | NA          | NA          | NA                | NA                        |  |  |  |
| <b>Acadv1</b>              |             |             |             |             |                   |                           |  |  |  |
| <i>Treatment</i>           | <i>rep1</i> | <i>rep2</i> | <i>rep3</i> | <i>mean</i> | <i>std. error</i> | <i>Tukey (HSD) Groups</i> |  |  |  |
| eggs on wax paper          | 15.859      | 17.579      | 19.217      | 17.552      | 0.969             | A                         |  |  |  |
| eggs on plants             | 19.057      | 37.17       | 20.116      | 25.448      | 0.521             | A                         |  |  |  |
| larvae on artificial diet  | 21.465      | 22.995      | 21.394      | 21.951      | 6.011             | A                         |  |  |  |
| larvae on plants           | 15.505      | 20.535      | 20.898      | 18.979      | 5.869             | A                         |  |  |  |
| larvae on plants with eggs | 17.477      | 17.435      | 18.479      | 17.797      | 5.474             | A                         |  |  |  |
| pupa                       | 0           | NA          | NA          | NA          | NA                | NA                        |  |  |  |
| adult male                 | 0           | NA          | NA          | NA          | NA                | NA                        |  |  |  |
| adult female               | 0           | NA          | NA          | NA          | NA                | NA                        |  |  |  |
| <b>LCMT1</b>               |             |             |             |             |                   |                           |  |  |  |
| <i>Treatment</i>           | <i>rep1</i> | <i>rep2</i> | <i>rep3</i> | <i>mean</i> | <i>std. error</i> | <i>Tukey (HSD) Groups</i> |  |  |  |
| eggs on wax paper          | 4.903       | 7.445       | 7.603       | 6.650       | 0.875             | A                         |  |  |  |
| eggs on plants             | 5.993       | 13.676      | 6.708       | 8.792       | 0.512             | A                         |  |  |  |
| larvae on artificial diet  | 5.491       | 6.026       | 4.396       | 5.304       | 2.339             | A                         |  |  |  |
| larvae on plants           | 4.355       | 4.274       | 4.749       | 4.459       | 2.451             | A                         |  |  |  |

|                            |             |             |             |             |                   |                           |  |  |  |
|----------------------------|-------------|-------------|-------------|-------------|-------------------|---------------------------|--|--|--|
| larvae on plants with eggs | 3.728       | 3.999       | 4.451       | 4.059       | 2.550             | A                         |  |  |  |
| pupa                       | 588.81      | NA          | NA          | NA          | NA                | NA                        |  |  |  |
| adult male                 | 0           | NA          | NA          | NA          | NA                | NA                        |  |  |  |
| adult female               | 0           | NA          | NA          | NA          | NA                | NA                        |  |  |  |
| <b>INTS9</b>               |             |             |             |             |                   |                           |  |  |  |
| <i>Treatment</i>           | <i>rep1</i> | <i>rep2</i> | <i>rep3</i> | <i>mean</i> | <i>std. error</i> | <i>Tukey (HSD) Groups</i> |  |  |  |
| eggs on wax paper          | 6.35        | 6.865       | 6.722       | 6.646       | 0.153             | A                         |  |  |  |
| eggs on plants             | 5.776       | 20.695      | 6.324       | 10.932      | 0.342             | A                         |  |  |  |
| larvae on artificial diet  | 7.455       | 8.242       | 6.701       | 7.466       | 4.823             | A                         |  |  |  |
| larvae on plants           | 5.752       | 6.804       | 6.762       | 6.439       | 4.884             | A                         |  |  |  |
| larvae on plants with eggs | 5.104       | 5.053       | 5.276       | 5.144       | 4.613             | A                         |  |  |  |
| pupa                       | 67.56       | NA          | NA          | NA          | NA                | NA                        |  |  |  |
| adult male                 | 0           | NA          | NA          | NA          | NA                | NA                        |  |  |  |
| adult female               | 0           | NA          | NA          | NA          | NA                | NA                        |  |  |  |
| <b>G103827</b>             |             |             |             |             |                   |                           |  |  |  |
| <i>Treatment</i>           | <i>rep1</i> | <i>rep2</i> | <i>rep3</i> | <i>mean</i> | <i>std. error</i> | <i>Tukey (HSD) Groups</i> |  |  |  |
| eggs on wax paper          | 0           | 0           | 0           | 0.000       | 0.000             | A                         |  |  |  |
| eggs on plants             | 0           | 0           | 0           | 0.000       | 0.000             | A                         |  |  |  |
| larvae on artificial diet  | 0           | 0           | 0           | 0.000       | 0.000             | A                         |  |  |  |
| larvae on plants           | 0           | 0           | 0.46        | 0.153       | 0.000             | A                         |  |  |  |
| larvae on plants with eggs | 0.294       | 0.238       | 0           | 0.177       | 0.000             | A                         |  |  |  |
| pupa                       | 0           | NA          | NA          | NA          | NA                | NA                        |  |  |  |



|                            |             |             |             |             |                   |                           |   |   |   |
|----------------------------|-------------|-------------|-------------|-------------|-------------------|---------------------------|---|---|---|
| adult male                 | 0           | NA          | NA          | NA          | NA                | NA                        |   |   |   |
| adult female               | 0           | NA          | NA          | NA          | NA                | NA                        |   |   |   |
| <b>Cyt-b5_2</b>            |             |             |             |             |                   |                           |   |   |   |
| <i>Treatment</i>           | <i>rep1</i> | <i>rep2</i> | <i>rep3</i> | <i>mean</i> | <i>std. error</i> | <i>Tukey (HSD) Groups</i> |   |   |   |
| eggs on wax paper          | 53.038      | 56.844      | 56.305      | 55.396      | 1.189             |                           |   | C | D |
| eggs on plants             | 24.07       | 40.171      | 24.836      | 29.692      | 10.836            |                           |   |   | D |
| larvae on artificial diet  | 203.802     | 200.745     | 168.154     | 190.900     | 9.305             | A                         | B |   |   |
| larvae on plants           | 141.924     | 142.421     | 123.257     | 135.867     | 5.244             |                           | B | C |   |
| larvae on plants with eggs | 292.456     | 167.289     | 226.568     | 228.771     | 57.271            | A                         |   |   |   |
| pupa                       | 1083.5      | NA          | NA          | NA          | NA                | NA                        |   |   |   |
| adult male                 | 0           | NA          | NA          | NA          | NA                | NA                        |   |   |   |
| adult female               | 0           | NA          | NA          | NA          | NA                | NA                        |   |   |   |
| <b>Ceacam1</b>             |             |             |             |             |                   |                           |   |   |   |
| <i>Treatment</i>           | <i>rep1</i> | <i>rep2</i> | <i>rep3</i> | <i>mean</i> | <i>std. error</i> | <i>Tukey (HSD) Groups</i> |   |   |   |
| eggs on wax paper          | 0.869       | 1.317       | 0.956       | 1.047       | 0.137             |                           | B |   |   |
| eggs on plants             | 2.903       | 4.139       | 2.818       | 3.287       | 0.598             | A                         |   |   |   |
| larvae on artificial diet  | 0.863       | 0.722       | 0.992       | 0.859       | 0.926             |                           | B |   |   |
| larvae on plants           | 0.853       | 1.316       | 1.149       | 1.106       | 0.427             |                           | B |   |   |
| larvae on plants with eggs | 1.129       | 1.382       | 0.999       | 1.170       | 0.952             |                           | B |   |   |
| pupa                       | 95.67       | NA          | NA          | NA          | NA                | NA                        |   |   |   |
| adult male                 | 4           | NA          | NA          | NA          | NA                | NA                        |   |   |   |
| adult female               | 3           | NA          | NA          | NA          | NA                | NA                        |   |   |   |

| <b>dpr6</b>                |             |             |             |             |                   |                           |   |  |  |  |
|----------------------------|-------------|-------------|-------------|-------------|-------------------|---------------------------|---|--|--|--|
| <i>Treatment</i>           | <i>rep1</i> | <i>rep2</i> | <i>rep3</i> | <i>mean</i> | <i>std. error</i> | <i>Tukey (HSD) Groups</i> |   |  |  |  |
| eggs on wax paper          | 182         | 204         | 208         | 198.000     | 8.083             | A                         |   |  |  |  |
| eggs on plants             | 212         | 232         | 225         | 223.000     | 5.859             | A                         |   |  |  |  |
| larvae on artificial diet  | 315         | 282         | 216         | 271.000     | 29.103            | A                         |   |  |  |  |
| larvae on plants           | 369         | 273         | 240         | 294.000     | 38.691            | A                         |   |  |  |  |
| larvae on plants with eggs | 295         | 280         | 251         | 275.333     | 12.914            | A                         |   |  |  |  |
| pupa                       | 208         | NA          | NA          | NA          | NA                | NA                        |   |  |  |  |
| adult male                 | 190         | NA          | NA          | NA          | NA                | NA                        |   |  |  |  |
| adult female               | 186         | NA          | NA          | NA          | NA                | NA                        |   |  |  |  |
| <b>aldB_2</b>              |             |             |             |             |                   |                           |   |  |  |  |
| <i>Treatment</i>           | <i>rep1</i> | <i>rep2</i> | <i>rep3</i> | <i>mean</i> | <i>std. error</i> | <i>Tukey (HSD) Groups</i> |   |  |  |  |
| eggs on wax paper          | 0.906       | 0.815       | 0.874       | 0.865       | 0.027             |                           | B |  |  |  |
| eggs on plants             | 2.492       | 3.242       | 2.434       | 2.723       | 0.549             | A                         |   |  |  |  |
| larvae on artificial diet  | 0.988       | 0.772       | 0.95        | 0.903       | 0.699             |                           | B |  |  |  |
| larvae on plants           | 1.142       | 1.586       | 1.411       | 1.380       | 0.260             |                           | B |  |  |  |
| larvae on plants with eggs | 1.211       | 1.257       | 1.627       | 1.365       | 0.659             |                           | B |  |  |  |
| pupa                       | 95.67       | NA          | NA          | NA          | NA                | NA                        |   |  |  |  |
| adult male                 | 4           | NA          | NA          | NA          | NA                | NA                        |   |  |  |  |
| adult female               | 3           | NA          | NA          | NA          | NA                | NA                        |   |  |  |  |
| <b>Plscr1</b>              |             |             |             |             |                   |                           |   |  |  |  |

| <i>Treatment</i>           | <i>rep1</i> | <i>rep2</i> | <i>rep3</i> | <i>mean</i> | <i>std. error</i> | <i>Tukey (HSD) Groups</i> |   |  |  |
|----------------------------|-------------|-------------|-------------|-------------|-------------------|---------------------------|---|--|--|
| eggs on wax paper          | 0.23        | 0.259       | 0.157       | 0.215       | 0.030             |                           | B |  |  |
| eggs on plants             | 0.412       | 0           | 0.564       | 0.325       | 0.074             |                           | B |  |  |
| larvae on artificial diet  | 0.801       | 0.672       | 0.523       | 0.665       | 0.120             |                           | B |  |  |
| larvae on plants           | 1.939       | 1.856       | 1.215       | 1.670       | 0.168             | A                         |   |  |  |
| larvae on plants with eggs | 1.752       | 1.473       | 1.685       | 1.637       | 0.238             | A                         |   |  |  |
| pupa                       | 6           | NA          | NA          | NA          | NA                | NA                        |   |  |  |
| adult male                 | 0           | NA          | NA          | NA          | NA                | NA                        |   |  |  |
| adult female               | 1           | NA          | NA          | NA          | NA                | NA                        |   |  |  |
| <b>CRYAB</b>               |             |             |             |             |                   |                           |   |  |  |
| <i>Treatment</i>           | <i>rep1</i> | <i>rep2</i> | <i>rep3</i> | <i>mean</i> | <i>std. error</i> | <i>Tukey (HSD) Groups</i> |   |  |  |
| eggs on wax paper          | 1.123       | 2.288       | 2.255       | 1.889       | 0.383             |                           | B |  |  |
| eggs on plants             | 1.212       | 2.532       | 1.894       | 1.879       | 0.353             |                           | B |  |  |
| larvae on artificial diet  | 2.539       | 1.942       | 1.686       | 2.056       | 0.402             |                           | B |  |  |
| larvae on plants           | 43.411      | 65.497      | 95.4        | 68.103      | 0.381             | A                         |   |  |  |
| larvae on plants with eggs | 27.462      | 49.381      | 41.932      | 39.592      | 0.214             | A                         |   |  |  |
| pupa                       | 178.35      | NA          | NA          | NA          | NA                | NA                        |   |  |  |
| adult male                 | 1           | NA          | NA          | NA          | NA                | NA                        |   |  |  |
| adult female               | 0           | NA          | NA          | NA          | NA                | NA                        |   |  |  |
| <b>panC_2</b>              |             |             |             |             |                   |                           |   |  |  |
| <i>Treatment</i>           | <i>rep1</i> | <i>rep2</i> | <i>rep3</i> | <i>mean</i> | <i>std. error</i> | <i>Tukey (HSD) Groups</i> |   |  |  |

|                            |             |             |             |             |                   |                           |   |  |  |
|----------------------------|-------------|-------------|-------------|-------------|-------------------|---------------------------|---|--|--|
| eggs on wax paper          | 0.081       | 0.055       | 0.067       | 0.068       | 0.008             |                           | B |  |  |
| eggs on plants             | 0.209       | 0.147       | 0.172       | 0.176       | 0.049             |                           | B |  |  |
| larvae on artificial diet  | 23.504      | 28.897      | 21.842      | 24.748      | 0.041             | A                         |   |  |  |
| larvae on plants           | 11.847      | 27.159      | 31.512      | 23.506      | 0.018             | A                         |   |  |  |
| larvae on plants with eggs | 15.113      | 19.666      | 18.967      | 17.915      | 7.782             | A                         |   |  |  |
| pupa                       | 0           | NA          | NA          | NA          | NA                | NA                        |   |  |  |
| adult male                 | 1           | NA          | NA          | NA          | NA                | NA                        |   |  |  |
| adult female               | 1           | NA          | NA          | NA          | NA                | NA                        |   |  |  |
| <b>Nomo1</b>               |             |             |             |             |                   |                           |   |  |  |
| <i>Treatment</i>           | <i>rep1</i> | <i>rep2</i> | <i>rep3</i> | <i>mean</i> | <i>std. error</i> | <i>Tukey (HSD) Groups</i> |   |  |  |
| eggs on wax paper          | 16.92       | 13.935      | 16.102      | 15.652      | 0.891             |                           | B |  |  |
| eggs on plants             | 22.962      | 10.997      | 21.822      | 18.594      | 2.721             |                           | B |  |  |
| larvae on artificial diet  | 35.574      | 34.375      | 39.171      | 36.373      | 3.466             | A                         |   |  |  |
| larvae on plants           | 29.158      | 29.566      | 31.928      | 30.217      | 3.813             | A                         |   |  |  |
| larvae on plants with eggs | 34.471      | 34.711      | 35.563      | 34.915      | 7.112             | A                         |   |  |  |
| pupa                       | 3426.76     | NA          | NA          | NA          | NA                | NA                        |   |  |  |
| adult male                 | 0           | NA          | NA          | NA          | NA                | NA                        |   |  |  |
| adult female               | 0           | NA          | NA          | NA          | NA                | NA                        |   |  |  |

**Supplementary Table 6.** Individual values, means, and statistical test (Tukey’s HSD test) summaries for all pairwise comparisons of the *Osiris 9E* fold changes across developmental stages shown in Supplementary Fig. 5.

| <i>Pieris rapae</i>     |           |           |           |           |           |                    |   |   |
|-------------------------|-----------|-----------|-----------|-----------|-----------|--------------------|---|---|
| Developmental stage     | rep1      | rep2      | rep3      | mean      | s.e.m.    | Tukey (HSD) Groups |   |   |
| 24h larvae              | 0.0030553 | 0.0027584 | 0.003472  | 0.0030952 | 0.000207  |                    |   | C |
| 48h larvae              | 0.0111659 | 0.0328474 | 0.042801  | 0.0289381 | 0.0093391 |                    |   | C |
| 72h larvae              | 0.1990372 | 0.1845324 | 0.0244288 | 0.1359995 | 0.0559423 |                    | B | C |
| 2nd instar              | 0.8467595 | 0.6366519 | 1.0936835 | 0.8590316 | 0.1320763 | A                  | B |   |
| 3rd instar              | 1.1591234 | 0.9780164 | 1.1282862 | 1.0884753 | 0.0559423 | A                  |   | C |
| 4th instar              | 0.3604731 | 0.1423509 | 0.3436663 | 0.2821634 | 0.0700744 |                    | B |   |
| 5th instar              | 0.9148744 | 0.9423553 | 0.7866263 | 0.8812853 | 0.0479897 | A                  | B |   |
| prepupa                 | 1.2875207 | 0.7287369 | 2.1228102 | 1.3796893 | 0.4050643 | A                  |   |   |
| pupa                    | 0.1133886 | NA        | NA        | 0.1133886 | NA        | NA                 |   |   |
| adult female            | 0.014935  | NA        | NA        | 0.014935  | NA        | NA                 |   |   |
| <i>Colias eurytheme</i> |           |           |           |           |           |                    |   |   |
| Developmental stage     | rep1      | rep2      | rep3      | mean      | s.e.m.    | Tukey (HSD) Groups |   |   |
| 24h larvae              | 9.883E-05 | 7.376E-05 | 0.0001001 | 9.091E-05 | 8.582E-06 |                    | B |   |
| 48h larvae              | 0.6794347 | 0.3236686 | 0.5700031 | 0.5243688 | 0.105205  | A                  |   |   |
| 72h larvae              | 0.0261241 | 0.0112276 | 0.0074933 | 0.0149483 | 0.0056909 |                    | B |   |
| 2nd instar              | 0.7882852 | 0.1967747 | 0.380937  | 0.4553323 | 0.174759  | A                  |   |   |
| 3rd instar              | 0.0132865 | 0.0415419 | 0.0550586 | 0.036629  | 0.0123062 |                    | B |   |
| 4th instar              | NA        | NA        | 0.0074369 | 0.0074369 | NA        | NA                 |   |   |
| 5th instar              | 0.0030519 | 0.003122  | 0.0007403 | 0.0023047 | 0.0007825 |                    | B |   |
| prepupa                 | 0.0006229 | 0.0006766 | 0.0004756 | 0.0005917 | 6.008E-05 |                    | B |   |
| pupa                    | NA        | NA        | NA        | NA        | NA        | NA                 |   |   |
| adult female            | 0.0022773 | 0.0034614 | 0.0044445 | 0.0033944 | 0.0006265 |                    | B |   |
| <i>Papilio polytes</i>  |           |           |           |           |           |                    |   |   |
| Developmental stage     | rep1      | rep2      | rep3      | mean      | s.e.m.    | Tukey (HSD) Groups |   |   |
| 24h larvae              | 0.0042847 | 0.0060155 | 0.0079452 | 0.0060818 | 0.0010572 |                    | B |   |
| 48h larvae              | NA        | 0.0002822 | 0.0001192 | 0.0002007 | 6.656E-05 |                    | B |   |
| 72h larvae              | NA        | NA        | 2.873E-05 | 2.873E-05 | NA        | NA                 |   |   |
| 2nd instar              | NA        | 0.0908007 | 0.0390395 | 0.0649201 | 0.0211314 |                    | B |   |
| 3rd instar              | 0.0122871 | 0.0314087 | 0.0458392 | 0.029845  | 0.0097171 |                    | B |   |

| 4th instar              | 0.1205018 | 0.5004385 | 0.4381417 | 0.3530273 | 0.1176454 |                    | B |  |
|-------------------------|-----------|-----------|-----------|-----------|-----------|--------------------|---|--|
| 5th instar              | 1.4504244 | 1.4805875 | 0.3666173 | 1.0992097 | 0.3663997 | A                  |   |  |
| prepupa                 | 1.477E-06 | 3.011E-08 | 1.818E-07 | 5.63E-07  | 1.53E-07  |                    | B |  |
| pupa                    | 6.409E-06 | 2.418E-06 | 4.795E-06 | 4.541E-06 | 1.159E-06 |                    | B |  |
| adult female            | 5.98E-06  | 4.648E-06 | 3.976E-06 | 4.868E-06 | 5.888E-07 |                    | B |  |
| <i>Heliconius cydno</i> |           |           |           |           |           |                    |   |  |
| Developmental stage     | rep1      | rep2      | rep3      | mean      | s.e.m.    | Tukey (HSD) Groups |   |  |
| 24h larvae              | 0.0001748 | 8.81E-05  | 7.004E-05 | 0.000111  | 3.232E-05 |                    | B |  |
| 48h larvae              | 2.976E-05 | 3.639E-05 | 3.005E-05 | 3.207E-05 | 2.165E-06 |                    | B |  |
| 72h larvae              | 0.0013058 | 0.0038315 | 0.0020306 | 0.0023893 | 0.0007508 |                    | B |  |
| 2nd instar              | 0.0012627 | 0.0026182 | 0.0013451 | 0.001742  | 0.0004387 |                    | B |  |
| 3rd instar              | 0.1434532 | 0.2239242 | 0.4180106 | 0.261796  | 0.0814885 | A                  |   |  |
| 4th instar              | 0.1584838 | 0.207667  | 0.4286732 | 0.2649413 | 0.083088  | A                  |   |  |
| 5th instar              | 0.0094337 | 0.0151617 | 0.0399316 | 0.021509  | 0.0093585 |                    | B |  |
| prepupa                 | 1.759E-05 | 5.732E-05 | 9.753E-05 | 5.748E-05 | 2.308E-05 |                    | B |  |
| pupa                    | 0.034641  | 0.0078983 | 0.0266907 | 0.0230767 | 0.0079286 |                    | B |  |
| adult female            | 0.0205087 | 0.0235544 | 0.0251669 | 0.0051803 | 0.0013658 |                    | B |  |

**Supplementary Table 7.** Individual values, means, and statistical test (Tukey’s HSD test) summary for the comparisons of *Osiris 9E* fold changes across various tissues of *P. rapae* third instar larvae shown in Supplementary Fig. 6.

| Tissue  | rep1   | rep2   | rep3   | mean   | s.e.m. | Tukey HSD Groups |   |
|---------|--------|--------|--------|--------|--------|------------------|---|
| Foregut | 1.8817 | 1.3643 | NA     | 1.6230 | 0.2587 | A                |   |
| Midgut  | 1.3577 | 1.1214 | 1.3405 | 1.2732 | 0.0932 | A                |   |
| Skin    | 0.0575 | 0.0496 | NA     | 0.0535 | 0.0040 |                  | B |

**Supplementary Table 8.** Single copy ortholog content was assessed using BUSCO (version 3.0.2) with insecta lineage protein set from Ortholog Database (version 9, creation date 2016-02-13), BLAST (version 2.3.0), and Augustus (version 3.3).

| <b>BUSCOs</b>            | <b>Prapae allpaths scaffolds</b> | <b>Prapae HiRise scaffolds</b> | <b>Prapae Chromosomes and unplaced scaffolds</b> | <b>Prapae Chromosomes only</b> |
|--------------------------|----------------------------------|--------------------------------|--------------------------------------------------|--------------------------------|
| Complete                 | 1555 (93.8%)                     | 1589 (95.9%)                   | 1587 (95.7%)                                     | 1452 (87.5%)                   |
| Complete and single copy | 1375 (82.9%)                     | 1432 (86.4%)                   | 1428 (86.1%)                                     | 1360 (82.0%)                   |
| Complete and duplicated  | 180 (10.9%)                      | 157 (9.5%)                     | 159 (9.6%)                                       | 92 (5.5%)                      |
| Fragmented               | 56 (3.4%)                        | 30 (1.8%)                      | 30 (1.8%)                                        | 33 (2.0%)                      |
| Missing                  | 47 (2.8%)                        | 39 (2.3%)                      | 41 (2.5%)                                        | 173 (10.5%)                    |
| Total Searched           | 1658                             | 1658                           | 1658                                             | 1658                           |



**Supplemental Table 9.** RNA-seq data from plant and butterfly species

| RNA-seq reads from plant treatments       | <i>A. thaliana</i> |            | <i>M. sativa</i> |            | <i>C. microcarpa</i> |            | <i>P. oerstedii</i> |            |
|-------------------------------------------|--------------------|------------|------------------|------------|----------------------|------------|---------------------|------------|
|                                           | PE100 reads        | SR50 reads | PE100 reads      | SR50 reads | PE100 reads          | SR50 reads | PE100 reads         | SR50 reads |
| leaves after 72h oviposition (Rep1)       |                    | 21,639,196 |                  | 26,858,839 |                      | 27,896,344 |                     | 22,763,741 |
| leaves after 72h oviposition (Rep2)       |                    | 22,438,375 |                  | 36,693,096 |                      | 28,539,350 |                     | 22,623,340 |
| leaves after 72h oviposition (Rep3)       |                    | 14,941,355 |                  | 30,231,556 |                      | 19,894,497 |                     | 24,959,732 |
| control leaves for 72h oviposition (Rep1) | 76,129,862         | 19,364,500 | 78,973,496       | 30,498,283 | 91,412,840           | 25,353,096 | 80,271,576          | 27,032,270 |
| control leaves for 72h oviposition (Rep2) |                    | 22,532,746 |                  | 24,553,867 |                      | 28,606,745 |                     | 26,642,181 |
| control leaves for 72h oviposition (Rep3) |                    | 22,259,053 |                  | 24,683,116 |                      | 25,798,401 |                     | 22,077,161 |
| leaves after 24h larval feeding (Rep1)    |                    | 22,312,484 |                  | 29,600,842 |                      | 38,948,895 |                     | 34,843,393 |

|                                                  |  |            |  |            |  |            |  |            |
|--------------------------------------------------|--|------------|--|------------|--|------------|--|------------|
| leaves after 24h larval feeding (Rep2)           |  | 19,993,693 |  | 9,457,426  |  | 34,499,506 |  | 28,488,412 |
| leaves after 24h larval feeding (Rep3)           |  | 23,015,788 |  | 25,757,440 |  | 33,470,124 |  | 29,895,097 |
| leaves with eggs after 24h larval feeding (Rep1) |  | 24,126,638 |  | 29,393,154 |  | 31,478,959 |  | 38,146,566 |
| leaves with eggs after 24h larval feeding (Rep2) |  | 27,405,885 |  | 32,592,609 |  | 31,945,118 |  | 32,441,898 |
| leaves with eggs after 24h larval feeding (Rep3) |  | 32,846,908 |  | 22,831,046 |  | 40,478,517 |  | 35,107,655 |
| control leaves for 24h larval feeding (Rep1)     |  | 19,307,208 |  | 31,493,122 |  | 33,057,620 |  | 35,728,964 |
| control leaves for 24h larval feeding (Rep2)     |  | 15,247,207 |  | 25,445,840 |  | 36,357,523 |  | 36,710,010 |
| control leaves for 24h larval feeding (Rep3)     |  | 28,278,897 |  | 25,680,542 |  | 32,830,868 |  | 33,291,937 |

|                                                |                        |            |                            |            |                          |            |                        |            |
|------------------------------------------------|------------------------|------------|----------------------------|------------|--------------------------|------------|------------------------|------------|
| leaves after 24h wounding (Rep1)               |                        | 23,137,056 |                            | 25,943,823 |                          | 34,815,190 |                        | 36,098,418 |
| leaves after 24h wounding (Rep2)               |                        | 15,708,770 |                            | 33,566,017 |                          | 37,242,158 |                        | 32,359,870 |
| leaves after 24h wounding (Rep3)               |                        | 15,139,341 |                            | 33,676,797 |                          | 32,036,477 |                        | 30,635,188 |
| <b>RNA-seq reads from butterfly treatments</b> | <b><i>P. rapae</i></b> |            | <b><i>C. eurytheme</i></b> |            | <b><i>P. polytes</i></b> |            | <b><i>H. cydno</i></b> |            |
|                                                | PE100 reads            | SR50 reads | PE100 reads                | SR50 reads | PE100 reads              | SR50 reads | PE100 reads            | SR50 reads |
| eggs on leaves after 72h oviposition (Rep1)    | 51,284,958             | 26,189,771 | 69,706,332                 | 28,983,275 | 65,934,998               | 31,706,333 | 75,509,498             | 25,978,394 |
| eggs on leaves after 72h oviposition (Rep2)    |                        | 13,639,140 |                            | 27,606,177 |                          | 23,990,652 |                        | 28,733,262 |
| eggs on leaves after 72h oviposition (Rep3)    |                        | 23,225,446 |                            | 28,421,623 |                          | 28,459,252 |                        | 23,432,067 |

|                                                     |            |            |            |            |            |            |            |            |
|-----------------------------------------------------|------------|------------|------------|------------|------------|------------|------------|------------|
| eggs on wax paper after 72h oviposition (Rep1)      |            | 22,615,848 |            | 25,429,477 |            | 28,152,911 |            | 26,367,632 |
| eggs on wax paper after 72h oviposition (Rep2)      |            | 20,753,366 |            | 33,402,631 |            | 25,904,895 |            | 30,869,940 |
| eggs on wax paper after 72h oviposition (Rep3)      |            | 17,549,302 |            | 26,197,572 |            | 28,617,920 |            | 30,547,665 |
| larvae on leaves after 24h feeding (Rep1)           |            | 17,841,901 |            | 21,684,935 |            | 33,603,426 |            | 34,539,669 |
| larvae on leaves after 24h feeding (Rep2)           |            | 15,970,738 |            | 24,829,703 |            | 29,788,442 |            | 29,345,527 |
| larvae on leaves after 24h feeding (Rep3)           |            | 31,116,237 |            | 29,608,766 |            | 31,713,851 |            | 20,813,092 |
| larvae on leaves with eggs after 24h feeding (Rep1) | 41,731,336 | 38,238,647 | 58,505,982 | 18,396,988 | 56,095,998 | 34,228,342 | 55,131,042 | 34,874,271 |
| larvae on leaves with eggs after                    |            | 23,463,201 |            | 41,944,678 |            | 35,932,927 |            | 28,741,649 |

|                                                                 |  |            |  |            |  |            |  |            |
|-----------------------------------------------------------------|--|------------|--|------------|--|------------|--|------------|
| 24h feeding<br>(Rep2)                                           |  |            |  |            |  |            |  |            |
| larvae on<br>leaves with<br>eggs after<br>24h feeding<br>(Rep3) |  | 27,648,012 |  | 32,583,736 |  | 34,730,888 |  | 35,992,224 |
| larvae on<br>artificial diet<br>after 24h<br>feeding<br>(Rep1)  |  | 20,259,852 |  | 20,689,227 |  | 29,104,773 |  | 27,525,825 |
| larvae on<br>artificial diet<br>after 24h<br>feeding(Rep2<br>)  |  | 17,132,971 |  | 46,524,562 |  | 32,380,255 |  | 31,087,478 |
| larvae on<br>artificial diet<br>after 24h<br>feeding<br>(Rep3)  |  | 22,139,037 |  | 37,819,789 |  | 26,477,204 |  | 28,877,256 |

**Supplementary Table 10.** Comparison of the RNA-seq results from the two different analysis methods for *Pieris rapae* and *Arabidopsis thaliana*.

| <b>Treatment</b>              | <b>Common</b> | <b>Trinity only</b> | <b>Cuffdiff only</b> |
|-------------------------------|---------------|---------------------|----------------------|
| Leaves with eggs              | 11558         | 1538                | 3005                 |
| Leaves with larvae, eggs      | 833           | 0                   | 921                  |
| Leaves with larvae            | 1033          | 0                   | 1035                 |
| Wounded leaves                | 1074          | 0                   | 1370                 |
| Eggs on leaves                | 763           | 260                 | 56                   |
| Larvae on leaves with eggs    | 397           | 174                 | 60                   |
| Larvae on leaves without eggs | 586           | 67                  | 33                   |

**Supplementary Table 11.** Primer sequences for cDNA synthesis for *Osiris 9E* spatial and temporal expression patterns

|                            |                       |
|----------------------------|-----------------------|
| <b><i>P. rapae</i></b>     |                       |
| Osiris_9E_PR_left primer   | TCGCGGTCTATTGCCATTGT  |
| Osiris_9E_PR_right primer  | TGTCTCTGGCGATAGGGTCA  |
| EF1a_PR_left primer        | ACAAAACCCCTCTGCGTTGA  |
| EF1a_PR_right primer       | TTGATGACTCCCACAGCGAC  |
| <b><i>C. eurytheme</i></b> |                       |
| Osiris_9E_CE_left primer   | GACCGCTAAGATTGCTCTGG  |
| Osiris_9E_CE_right primer  | CGTATGTCGTCTTGGTGTGG  |
| EF1a_CE_left primer        | AAGGTTGACCGTCGTA CTGG |
| EF1a_CE_right primer       | GGGAACTCCTGGAAGGACTC  |
| <b><i>H. cydno</i></b>     |                       |
| Osiris_9E_HC_left primer   | GCGCCAGGAATATTGTGATT  |
| Osiris_9E_HC_right primer  | ACTTCGGCATCTCTTGCTGT  |
| EF1a_HC_left primer        | TCGACAAACGTACCATCGAA  |
| EF1a_HC_right primer       | GCTCAGCCTTCAGTTTGTCC  |
| <b><i>P. polytes</i></b>   |                       |
| Osiris_9E_PP_left primer   | GACCGCTAAGATTGCTCTGG  |
| Osiris_9E_PP_right primer  | CGTATGTCGTCTTGGTGTGG  |
| EF1a_PP_left primer        | AACATTGTCGTCATCGGACA  |
| EF1a_PP_right primer       | GGCCTCCTTCTCGAACTTCT  |

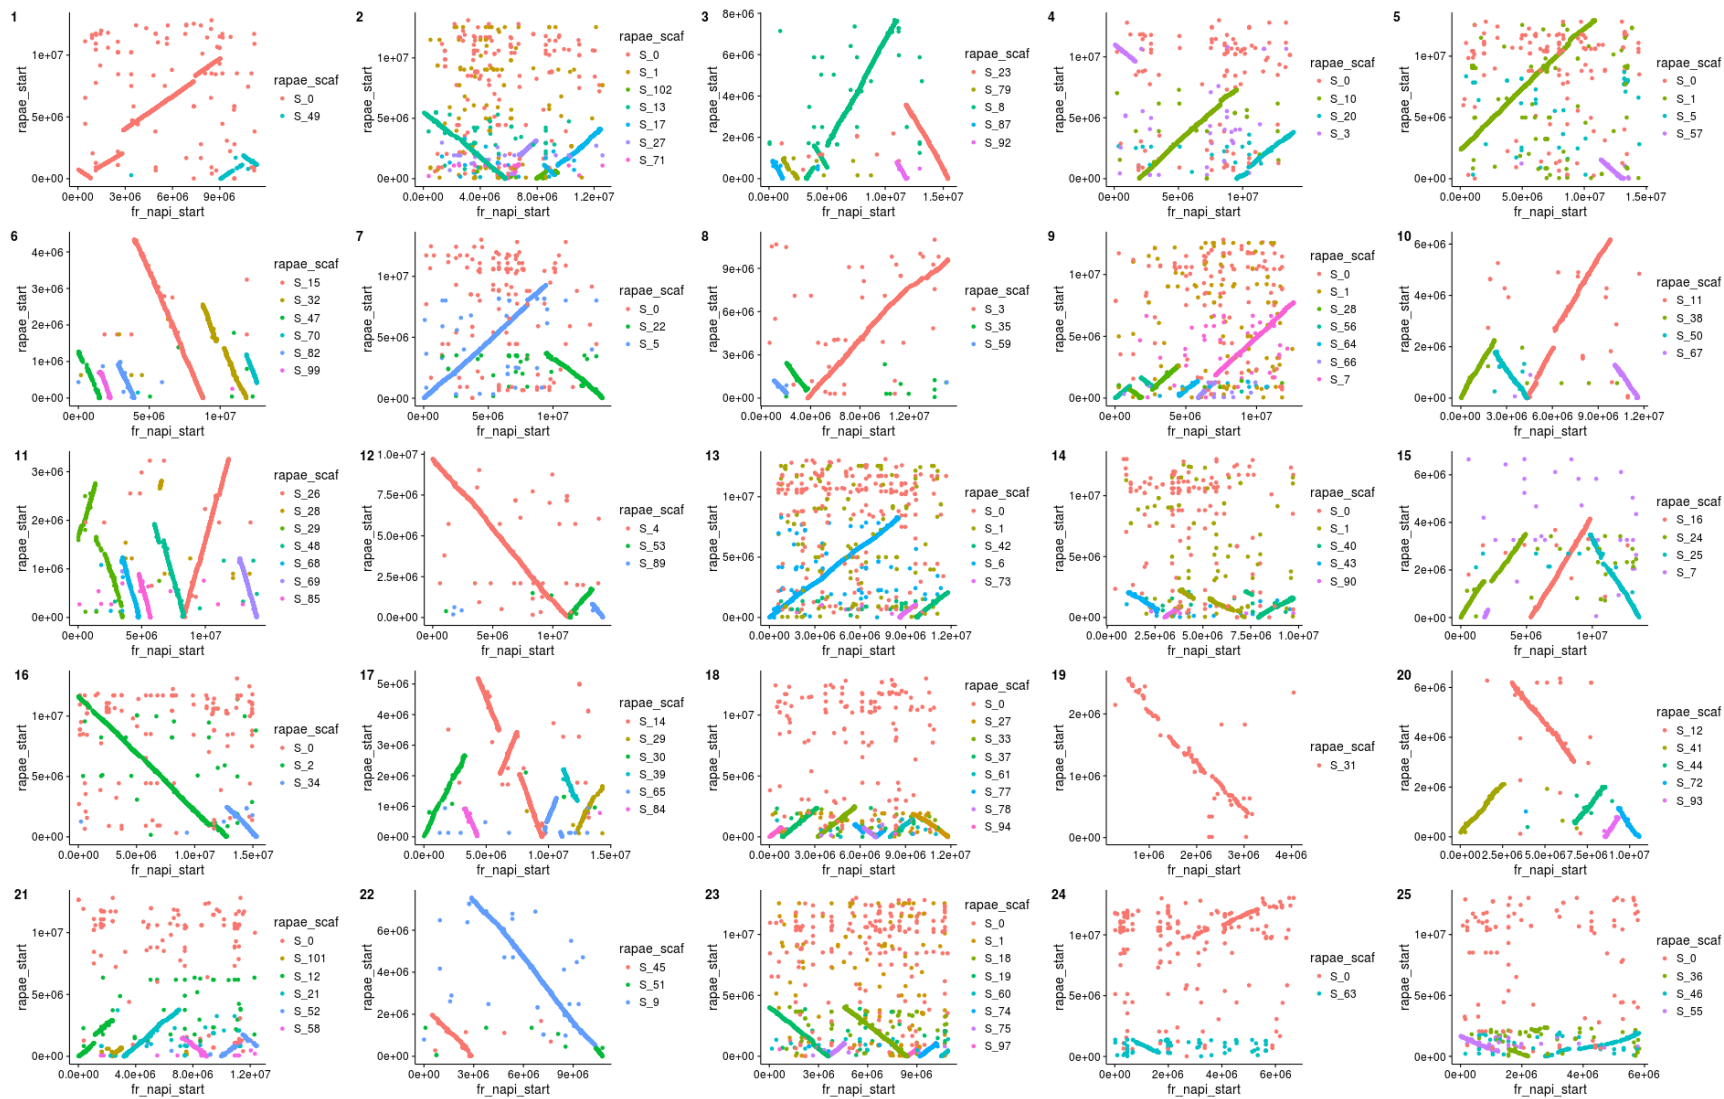



**Supplementary Figure 1: Alignment of *P. rapae* scaffolds to *P. napi* chromosomes.** The 102 largest scaffolds in the *P. rapae* assembly were aligned to the 25 chromosomes of *P. napi* using LAST (version 714). Each panel depicts a *P. napi* chromosome and the *P. rapae* HiRise scaffolds that aligned to it. 82 of the 102 scaffolds in the *P. rapae* assembly mapped in full to the *P. napi* chromosomes. Coordinates of the mapped scaffolds and scaffold segments were used to place the *P. rapae* HiRise assembly in a chromosomal context using a custom R script (Supplementary Material finalPrapae.agp), assuming conservation of synteny between *P. napi* and *P. rapae*. While there may be some differences in chromosomal organization between the two species, the completeness of scaffolds mapping to chromosomes combined with mate pairs spanning junctions between scaffolds lend support to this *P. rapae* chromosomal model.

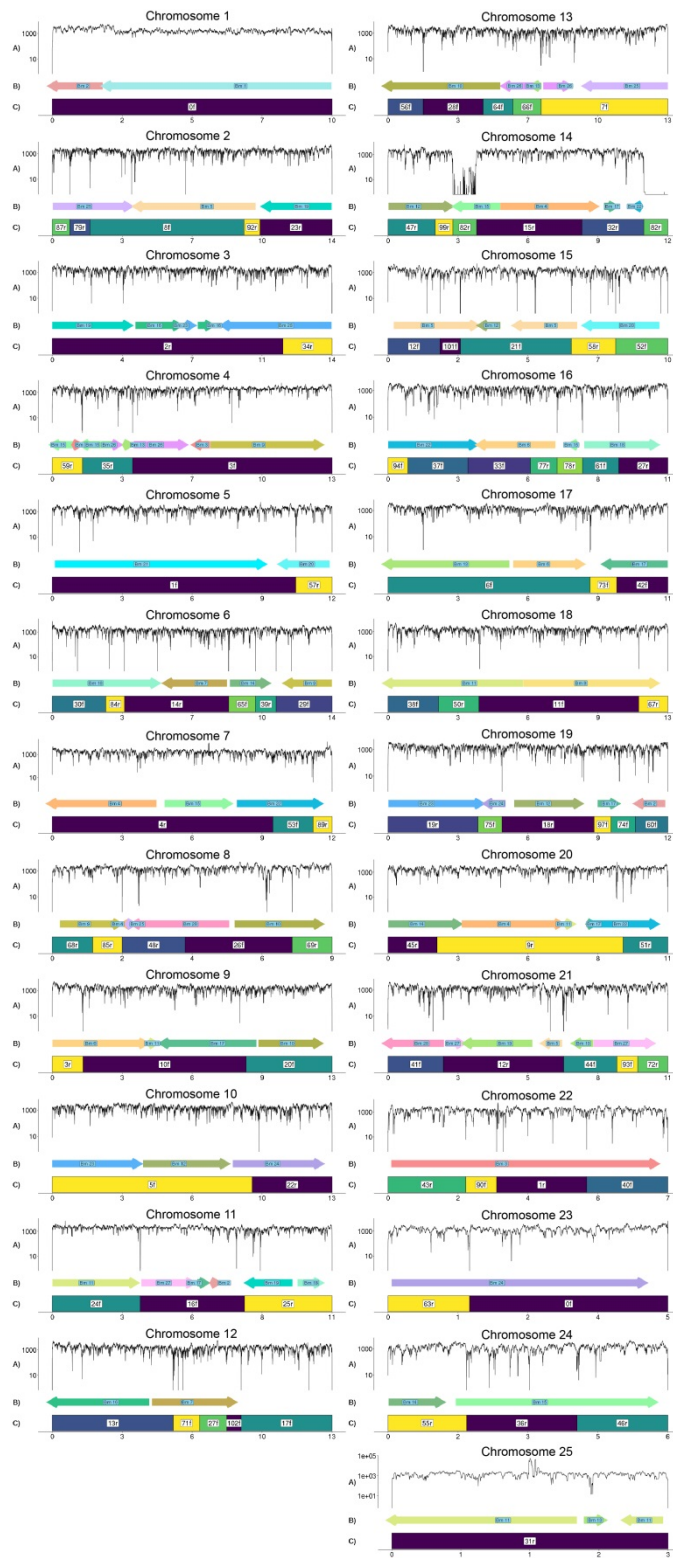

**Supplementary Figure 2: Chromosomal assembly of butterfly *Pieris rapae* genome.** (a) Read pairs from the 3 kbp, 7 kbp, and 40 kbp insert size mate pair libraries were mapped to the *P. rapae* chromosomes and the number of times a position was flanked by read pair mapped in the proper orientation with a mapq > 20 for both reads was counted. A count of zero occurs at a position where no mate pairs span which can be caused by either a misassembly or a high density repetitive sequence. (b) Orthologous genes from *Bombyx mori* occur in blocks along the *P. rapae* chromosomes and their *B. mori* chromosome of origin and orientation are shown above (c) the number and direction, forward or reverse, of the component scaffold used to construct the chromosome. A chromosome misassembly is less likely to occur within a scaffold, within a syntenic block, or where mate pair spanning is high. Taken together we regard a scaffold join that is spanned by an average number of mate pairs and a syntenic block from *B. mori* to be correct.

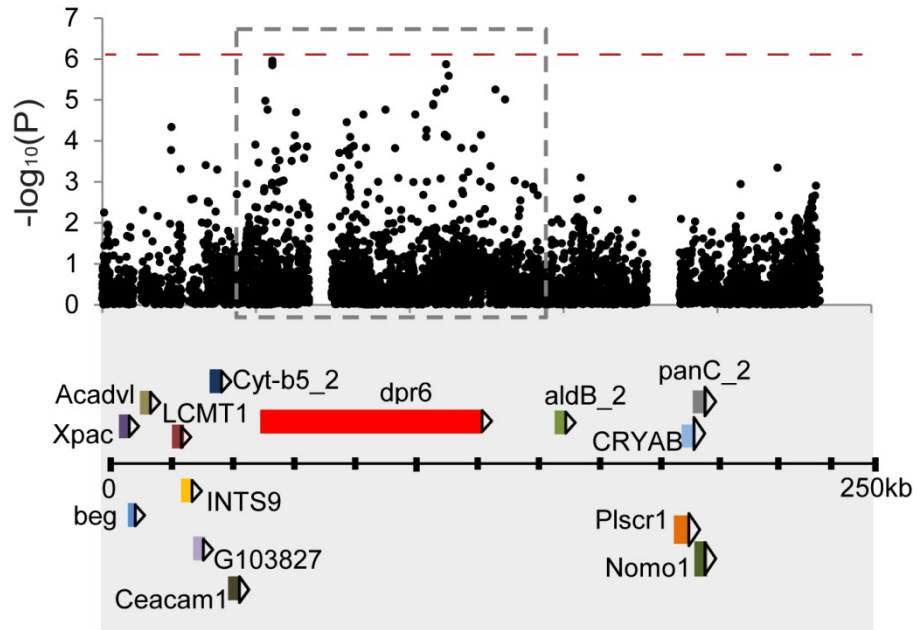

**Supplementary Figure 3: Chromosome 15 peak region.** Zoom-in on the chromosome 15 region (boxed) associated with herbivory in the *P. rapae* genome. A gene map below shows the underlying genes found in the associated and the adjoining regions.

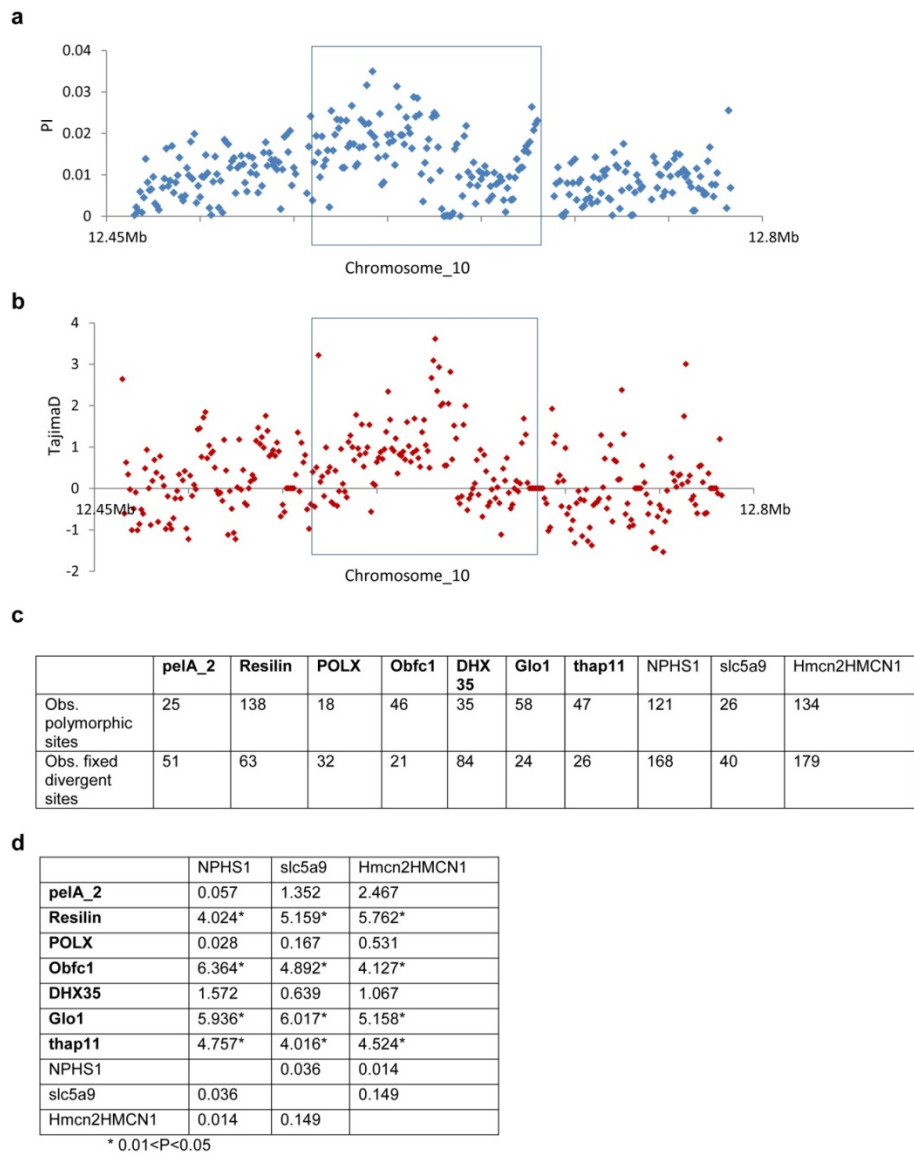

**Supplementary Figure 4: Chromosome 10 peak selection scans.** Population genetic scans for evidence of natural selection across the herbivory associated region on *P. rapae* chromosome 10. (a) Nucleotide diversity ( $\pi$ ) in the herbivory associated region (boxed) and 100 kbp upstream and downstream. (b) Tajima's D values in the herbivory associated region (boxed) and 100 kbp upstream and downstream. (c) The observed number of polymorphic and fixed divergent sites found in the CDS of genes in the herbivory associated region (bold) and neighboring genes. (d) HKA test results.

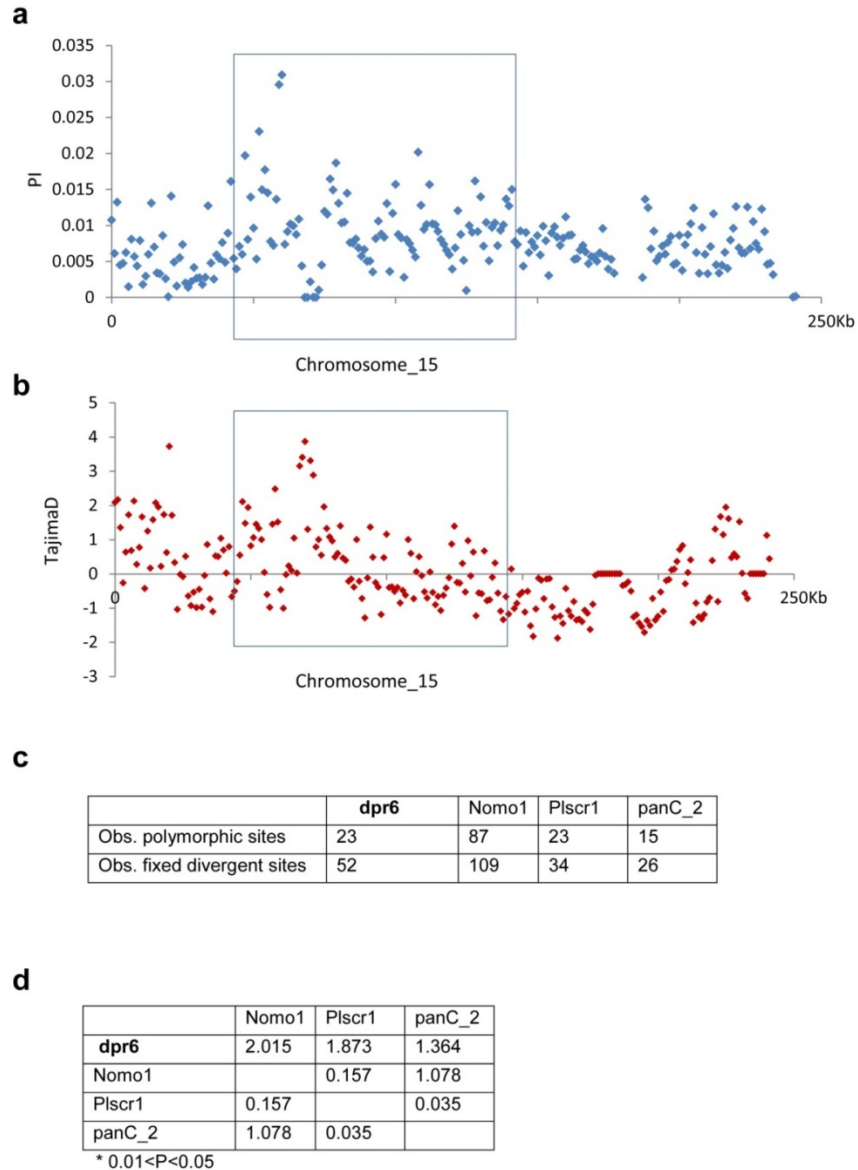

**Supplementary Figure 5: Chromosome 15 peak selection scans.** Population genetic scans for evidence of natural selection across the herbivory associated region on *P. rapae* chromosome 15. (a) Nucleotide diversity ( $\pi$ ) in the herbivory associated region (boxed) and 100 kbp upstream and downstream. (b) Tajima's D values in the herbivory associated region (boxed) and 100 kbp upstream and downstream. (c) The observed number of polymorphic and fixed divergent sites found in the CDS of genes in the herbivory associated region (bold) and neighboring genes. (d) HKA test results.

**Legend**

- *Bombyx mori*
- *Colias eurytheme* transcriptome
- *Pieris rapae* transcriptome
- *Papilio polytes* transcriptome
- *Heliconius cydno* transcriptome
- *Pieris rapae* genome
- *Danaus plexippus*
- *Drosophila melanogaster*

Tree scale: 1

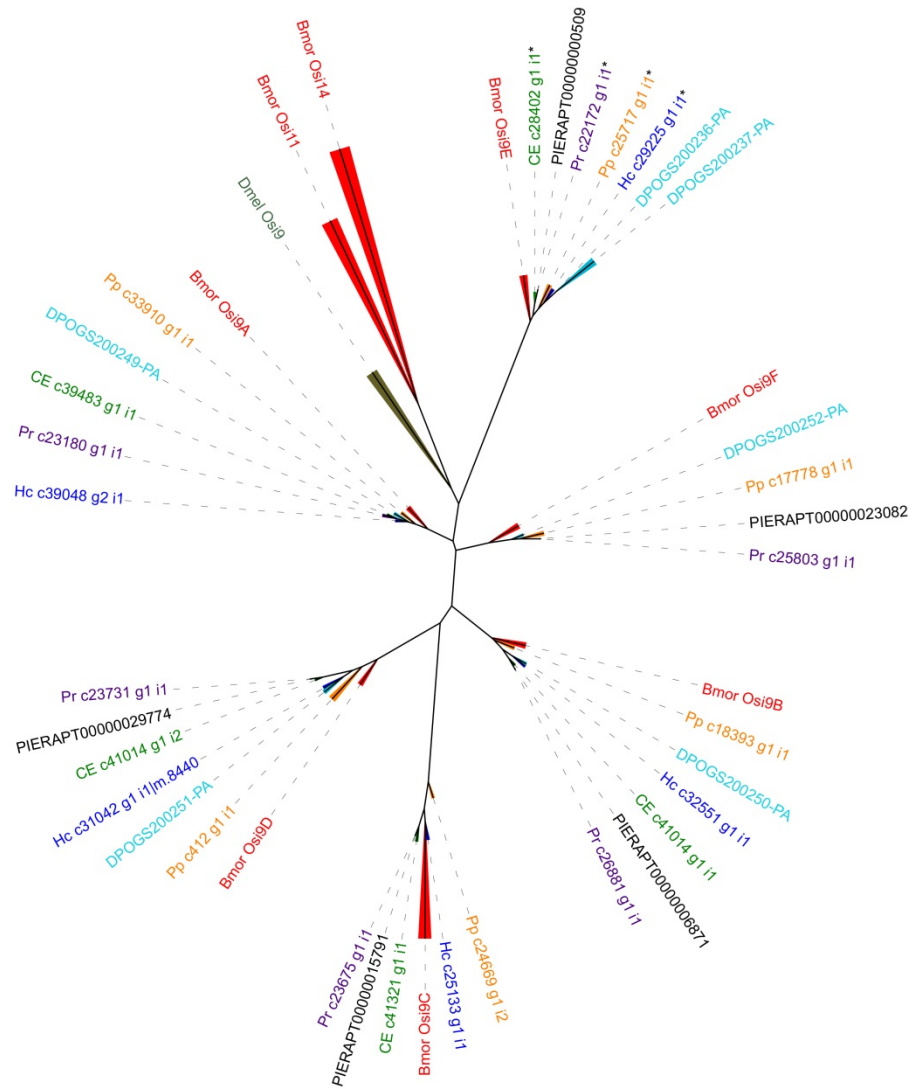

**Supplementary Figure 6: Osiris 9 protein Tree.** Tree of *Osiris 9* protein sequences extracted from the *Pieris rapae* genome and each of the four assembled transcriptomes—*Colias eurytheme*, *Pieris rapae*, *Papilio polytes*, and *Heliconius cydno*. These are combined with *Osiris 9* protein sequences from *Drosophila melanogaster*, *Bombyx mori*, and *Danaus plexippus*, as well as *Osiris 11* and *Osiris 14* from *B. mori*. While *Osi9* is clearly a multi-copy gene across the Lepidoptera, we found one copy to be up-regulated in larvae of all four butterfly species when feeding on leaves with prior exposure to eggs (Supplementary data 10). These genes are marked with an asterisk and the *Osi9* tree shows that they are all *Osi9E*.

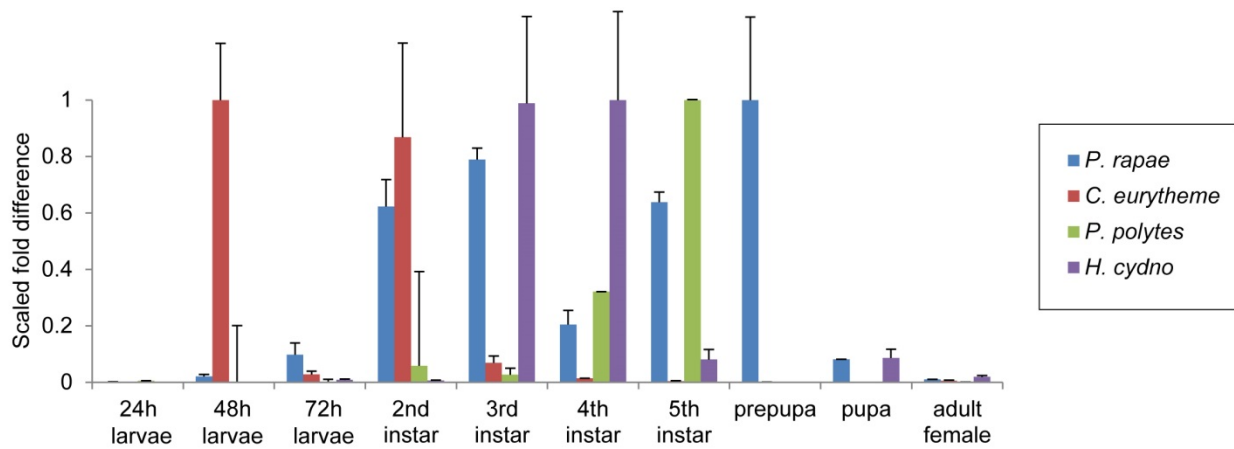

**Supplementary Figure 7: Temporal expression patterns of *Osiris 9E*.** Temporal expression patterns of *Osiris 9E* with positive standard error of the mean for all the three biological replicates in a given developmental stage. Developmental stages are represented along the x-axis with gene expression, fold difference of *Osi9E* relative to control gene *EF1a*, along the y-axis. Plots show mean  $\pm$  s.e.m., scaled to the highest value for each species. Individual values, means, and statistical tests are in Supplementary Table 6.



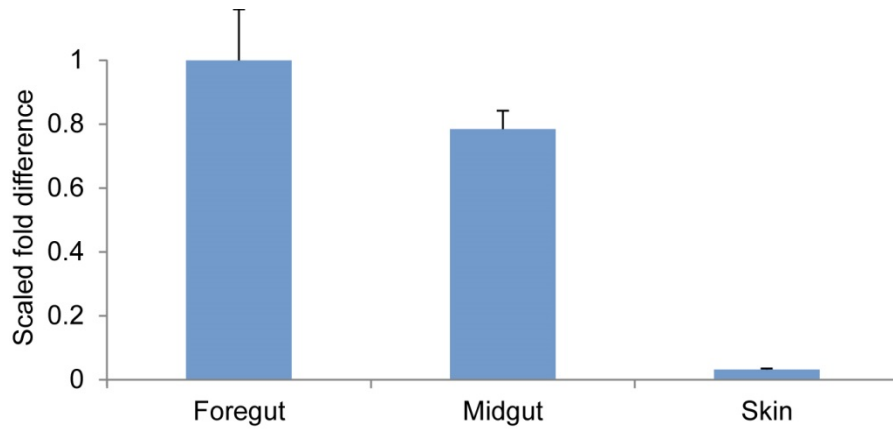

**Supplementary Figure 8: Spatial expression patterns of *Osiris 9E*.** Spatial expression patterns of *Osiris 9E* with positive standard error of the mean for all the three biological replicates in the larval 3rd instar of *P. rapae*. Various parts of the body are represented along the x-axis with gene expression, fold difference of *Osi9E* relative to control gene *EFlα*, along the y-axis. Plots show mean  $\pm$  s.e.m., scaled to the highest value. Individual values, means, and statistical tests are in Supplementary Table 7.

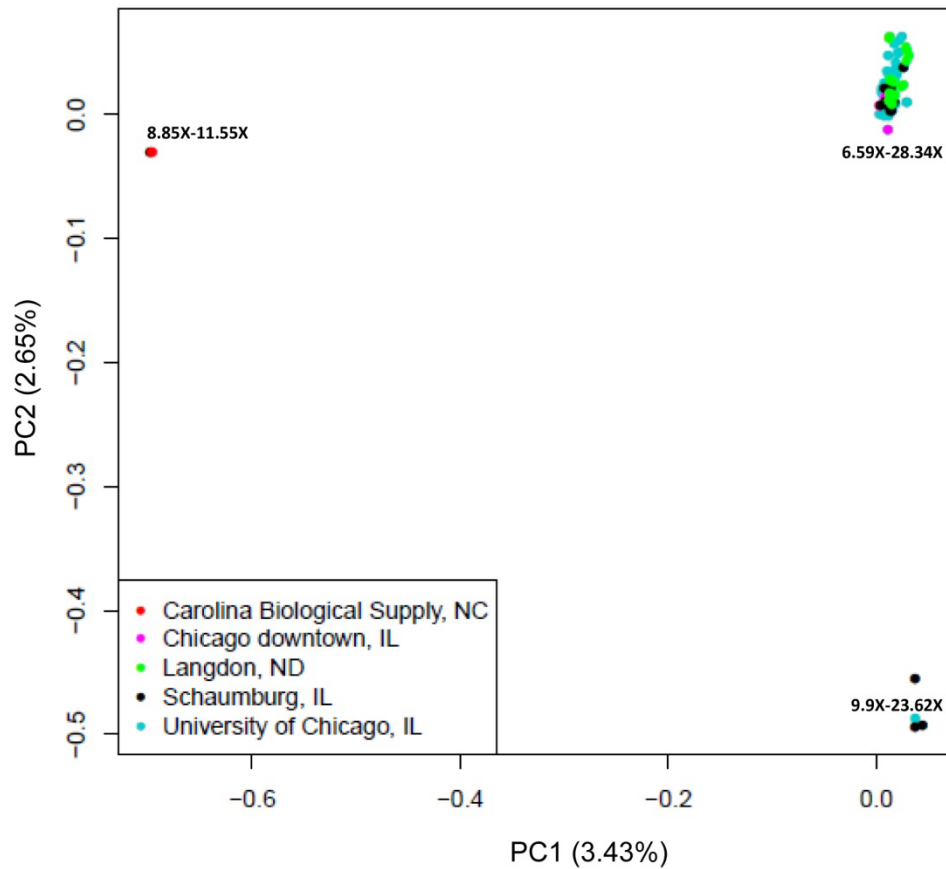

**Supplementary Figure 9: *P. rapae* GWAS samples PCA plot.** A PCA plot of the *P. rapae* samples used in the GWAS shows evidence of some population genetic structure but not associated with sampling location or sequencing coverage. The minimum and maximum sequencing coverage depth is shown for each group.

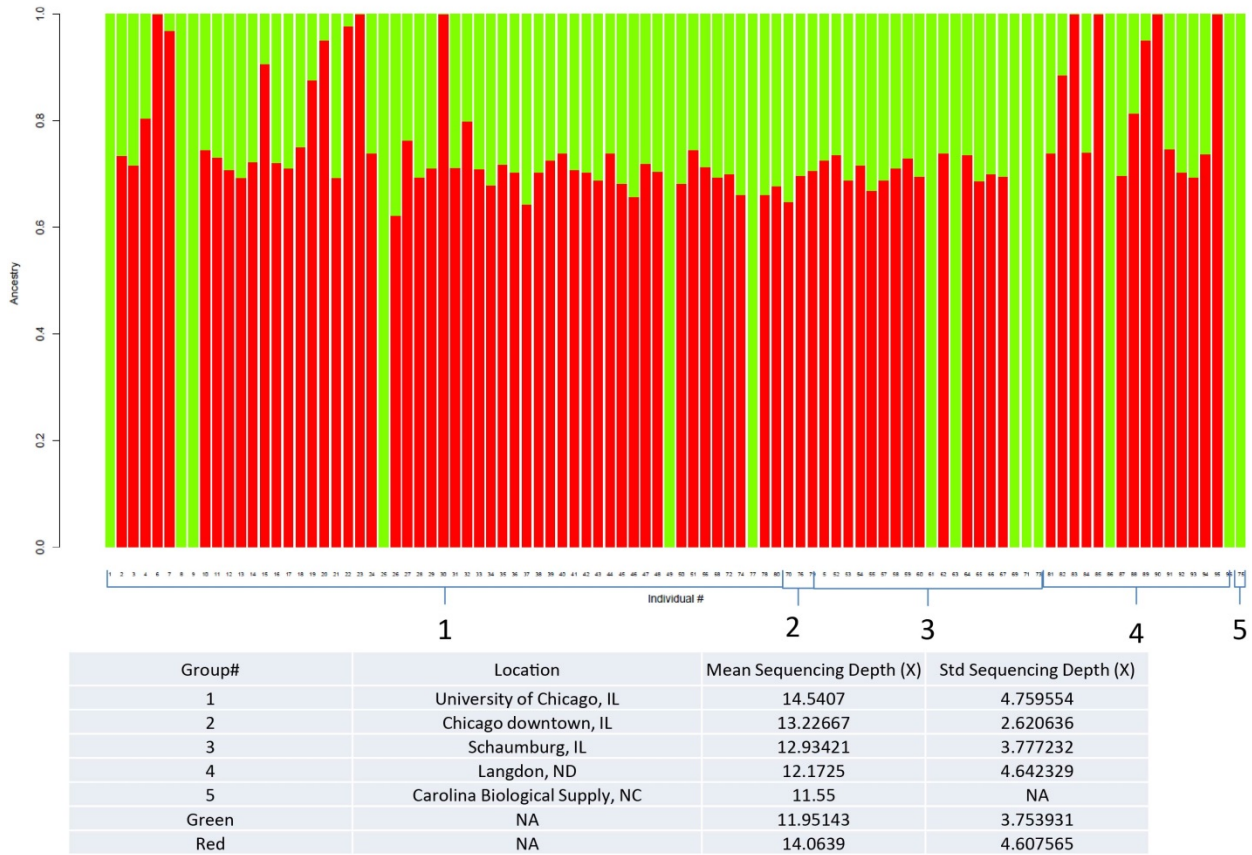

**Supplementary Figure 10: *P. rapae* GWAS samples Admixture plot.** An Admixture plot of the *P. rapae* samples used in the GWAS shows evidence of some population genetic structure but not associated with sampling location or sequencing coverage. The plot was generated using  $K = 2$ , which had the lowest cross-validation error compared to other values of  $K$ . The samples are grouped according to sampling location, and the mean and the standard deviation of the sequencing coverage of every group are shown.

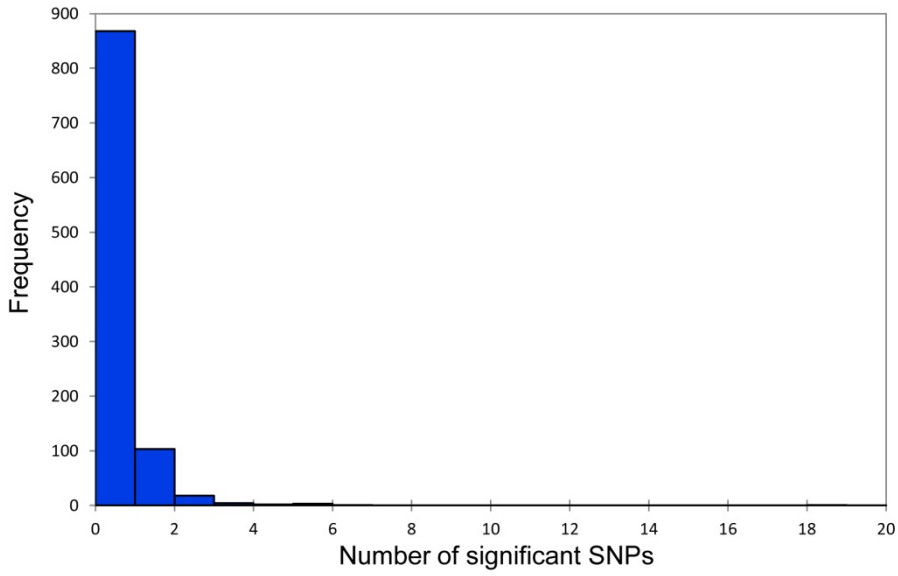

| Number significant SNPs | Frequency |
|-------------------------|-----------|
| 0                       | 868       |
| 1                       | 103       |
| 2                       | 18        |
| 3                       | 4         |
| 4                       | 2         |
| 5                       | 3         |
| 6                       | 1         |
| 7                       | 0         |
| 8                       | 0         |
| 9                       | 0         |
| 10                      | 0         |
| 11                      | 0         |
| 12                      | 0         |
| 13                      | 0         |
| 14                      | 0         |
| 15                      | 0         |
| 16                      | 0         |
| 17                      | 0         |
| 18                      | 1         |

**Supplementary Figure 11: *P. rapae* GWAS permutation test.** Number of significant SNPs at our empirical significance threshold from association tests that were repeated 1,000 times with randomized phenotype data.

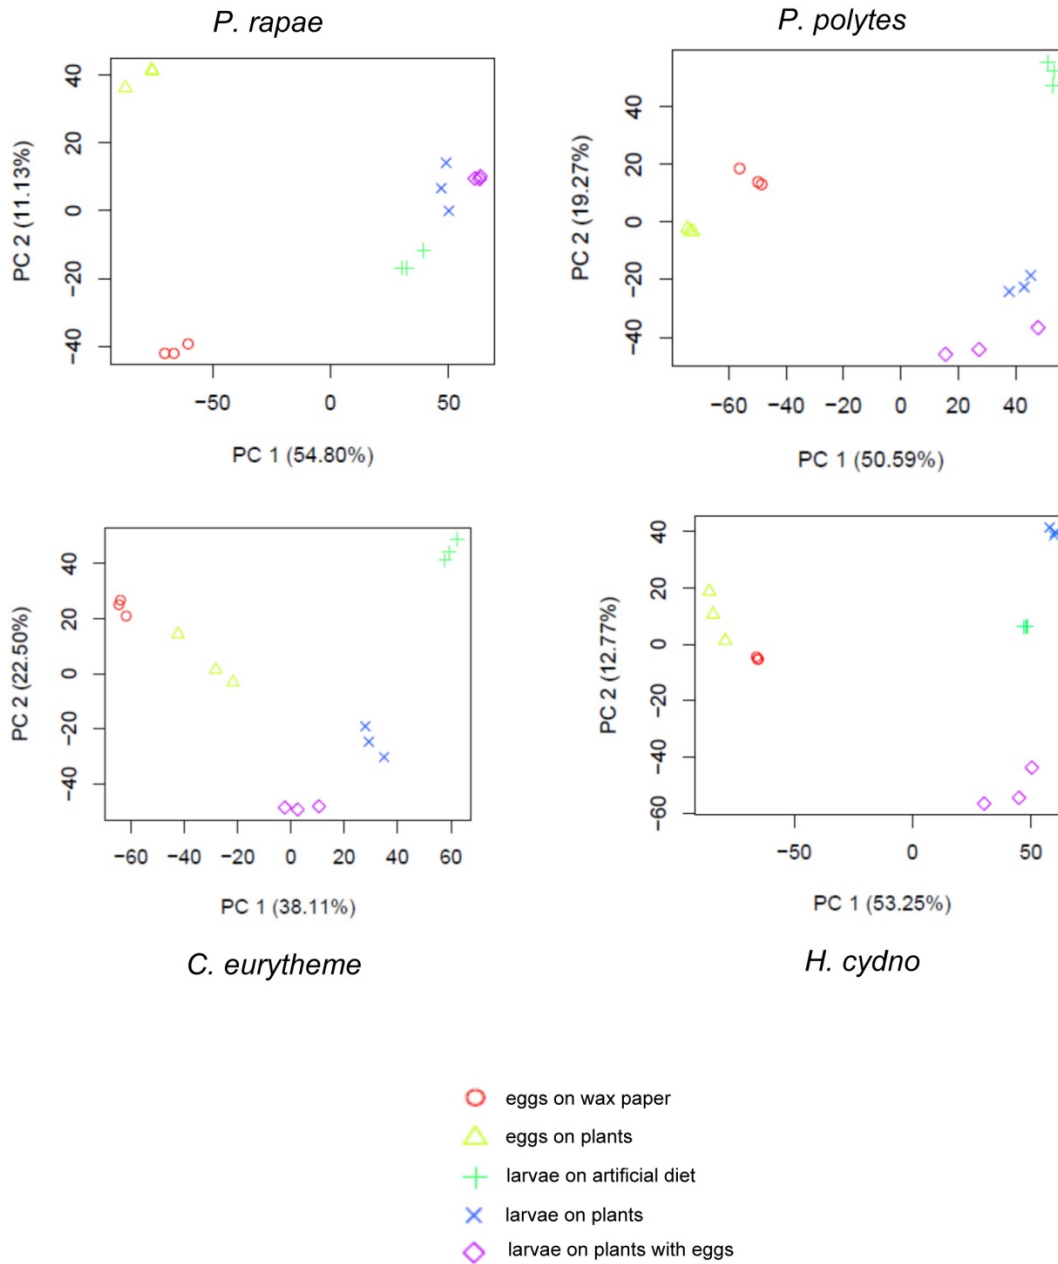

**Supplementary Figure 12: PCA plots of plant RNA-seq data.** PCA plots displaying the correlation among samples and treatments from the RNA-seq experiments from all four plants species.

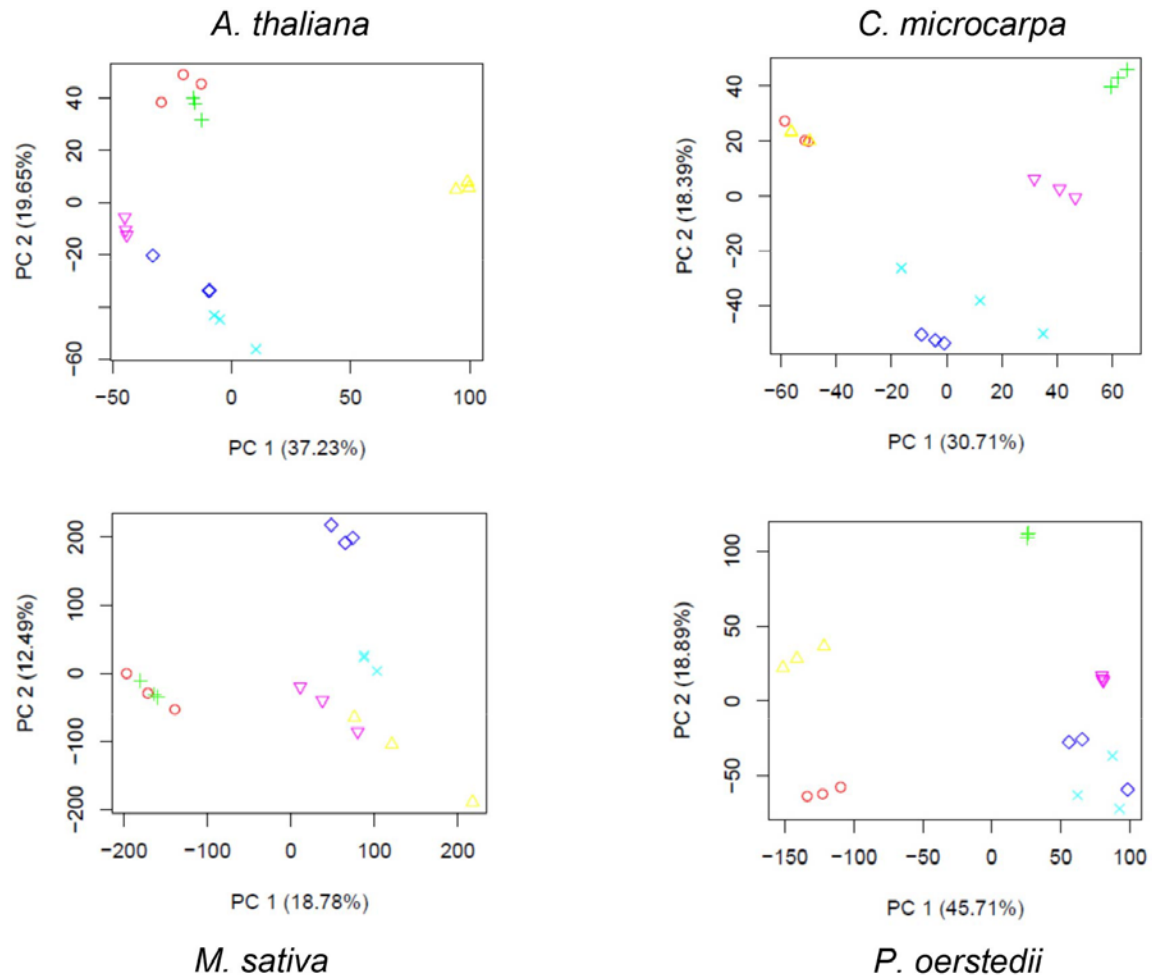

**Supplementary Figure 13: PCA plots of butterfly RNA-seq data.** PCA plots displaying the correlation among samples and treatments from the RNA-seq experiments from all four butterfly species.
